# Supplementary material
Source: PubMed Central journal article supplement (PMC5047076)
Supplement: supp_pp.16.00501_PP2016-00501R1_Supplemental_files_1_and_2.pdf [file supp_pp.16.00501_PP2016-00501R1_Supplemental_files_1_and_2.pdf]

## Supplemental file 1

Genomic DNA sequences of Sh1 candidate gene of SWCC8 and CC3.  
Introns are highlighted in yellow.

```
CC3      ATGGAGGTAACGCCATTCTAGAAAGAGAACTCAAAAAGATTTCGATCTGTGGTCGGCCTT
SWCC8    ATGGAGGTAACGCCATTCTAGAAAGAGAACTCAAAAAGATTTCGATCTGTGGTCGGCCTT
*****

CC3      GACTTTCGGGATTCCTTTATTTCATCGGACGTTGTCGAGAAACGGCGGTGACCTGATGAG
SWCC8    GACTTTCGGGATTCCTTTATTTCATCGGACGTTGTCGAGAAACGGCGGTGACCTGATGAG
*****

CC3      GCTATTAAGTACATTCTCGAAAACCCCTGGGTTTTTGGCCAGGCCACTGTCTGTTGTACGG
SWCC8    GCTATTAAGTACATTCTCGAAAACCCCTGGGTTTTTGGCCAGGCCACTGTCTGTTGTACGG
*****

CC3      ACTGTCACTAGCACCGGTGCTCGAGTTTCGACACAGTTCATGCAGAAGGATCTATGGAG
SWCC8    ACTGTCACTAGCACCGGTGCTCGAGTTTCGACACAGTTCATGCAGAAGGATCTATGGAG
*****

CC3      TCGGAGGAGGTAGCGAAACCGACGGTACAAGTGAAGGAGGAACCGGGTTTAGGGCTCGAA
SWCC8    TCGGAGGAGGTAGCGAAACCGACGGTACAAGTGAAGGAGGAACCGGGTTTAGGGCTCGAA
*****

CC3      GATAAAGGCATTGATAATTGGGGAGTAAGCTCGGATCGTTCAAAGGTCAGTGAACGTCG
SWCC8    GATAAAGGCATTGATAATTGGGGAGTAAGCTCGGATCGTTCAAAGGTCAGTGAACGTCG
*****

CC3      AAAATGACACTTGACGAGTTTCTTAAACCGAATGCGATGAGCGATGAGGAGTATAGCAAG
SWCC8    AAAATGACACTTGACGAGTTTCTTAAACCGAATGCGATGAGCGATGAGGAGTATAGCAAG
*****

CC3      ATCCTTAAGGAAATGGCGGCAGCGAAACCCAGTGCCAAGAATAATGTAAAGGAGGAACCA
SWCC8    ATCCTTAAGGAAATGGCGGCAGCGAAACCCAGTGCCAAGAATAATGTAAAGGAGGAACCA
*****

CC3      GTTGAGGCGATGGCGCAATCTGGTGTGGTACAAATGCGAGGGTAAAAGAAGAACCAGAT
SWCC8    GTTGAGGCGATGGCGCAATCTGGTGTGGTACAAATGCGAGGGTAAAAGAAGAACCAGAT
*****

CC3      TTGGAGGTTAAGAACAGAGCATTGCTAAAAAAGCAAGGTCGGAGACTGAAAATTTTGCA
SWCC8    TTGGAGGTTAAGAACAGAGCATTGCTAAAAAAGCAAGGTCGGAGACTGAAAATTTTGCA
*****

CC3      ATGTCGGTTTCAAGCAATACAAGTGGCATGCAAAGGAATGGGACCTTTTCTAATGATGGG
SWCC8    ATGTCGGTTTCAAGCAATACAAGTGGCATGCAAAGGAATGGGACCTTTTCTAATGATGGG
*****

CC3      AGGTGCAAGATTGAAGATGGGGATTTCCCTATTGAGCCCGATTGGTTTTTGGTGGGAAGG
SWCC8    AGGTGCAAGATTGAAGATGGGGATTTCCCTATTGAGCCCGATTGGTTTTTGGTGGGAAGG
*****

CC3      ACAGTGGTCACAGCCATGTCCACCACGAAAGGAATAAATTAGCAGATAATGAAATGTT
SWCC8    ACAGTGGTCACAGCCATGTCCACCACGAAAGGAATAAATTAGCAGATAATGAAATGTT
*****

CC3      AATTTTCGCTTTCCTTCTTCAAGTTCAGATTCAATGCGCAATGGATTGTTGCTTCTCA
SWCC8    AATTTTCGCTTTCCTTCTTCAAGTTCAGATTCAATGCGCAATGGATTGTTGCTTCTCA
*****

CC3      ACTAAAAGAAGTGGAGAGGTATGTGATGAGAGTAGTTGAATTTTAAACCATTTTCATTCTC
SWCC8    ACTAAAAGAAGTGGAGAGGTATGTGATGAGAGTAGTTGAATTTTAAACCATTTTCATTCTC
*****

CC3      ATGGGGTTTCATTTCTTGTGCAATATATGTGCAATATGATATATCTTCAATGTGTTCTGA
SWCC8    ATGGGGTTTCATTTCTTGTGCAATATATGTGCAATATGATATATCTTCAATGTGTTCTGA
*****
```

CC3 **TGTTAAATTTGTGCTGTGATCACTTTTAGATTGGTCGCCTACCAATGGAGTGGGCAAAAT**  
SWCC8 TGTTAAATTTGTGCTGTGATCACTTTTAGATTGGTCGCCTACCAATGGAGTGGGCAAAAT  
\*\*\*\*\*

CC3 GTGTAGTTCACCTTGTCAACTCCAGAAAGTTAAATTTCTTGACGATGTATAGCTGCAC  
SWCC8 GTGTAGTTCACCTTGTCAACTCCAGAAAGTTAAATTTCTTGACGATGTATAGCTGCAC  
\*\*\*\*\*

CC3 CAGGAAACCTTCACATAATGCAAGAGATCCTTCTATATGTTAG**GTAGAGAATGTTAGTTT**  
SWCC8 CAGGAAACCTTCACATAATGCAAGAGATCCTTCTATATGTTAGGTAGAGAATGTTAGTTT  
\*\*\*\*\*

CC3 **TTATTATCATTTTTTTATTGTGGGGCTTGGATTCTTAATGTAAGCTCAACTGGATTCAA**  
SWCC8 TTATTATCATTTTTTTATTGTGGGGCTTGGATTCTTAATGTAAGCTCAACTGGATTCAA  
\*\*\*\*\*

CC3 **ACAACCTAATGGAATTAGTTGGTTATCTGTTTGGCAG**CTTTTATATTCATAATTCAGTATT  
SWCC8 ACAACCTAATGGAATTAGTTGGTTATCTGTTTGGCAGCTTTTATATTCATAATTCAGTATT  
\*\*\*\*\*

CC3 CTCAGACATTGATACAGTTACATGGAAGCTGGAGGCTACGCACATTGACTCTACAATTTA  
SWCC8 CTCAGACATTGATACAGTTACATGGAAGCTGGAGGCTACGCACATTGACTCTACAATTTA  
\*\*\*\*\*

CC3 TCCTCTCTTACCCTTTTCAAATTACTGAAAATCACACCGTACCAGAAG**TTATCATTCA**  
SWCC8 TCCTCTCTTACCCTTTTCAAATTACTGAAAATCACACCGTACCAGAAGTTATCATTCA  
\*\*\*\*\*

CC3 **CTAAAAGTTCTTGTTCATATGCACGTAATATAGTATGAGTTCTTCAGTTTTTATGTCGAT**  
SWCC8 CTAAAAGTTCTTGTTCATATGCACGTAATATAGTATGAGTTCTTCAGTTTTTATGTCGAT  
\*\*\*\*\*

CC3 **TTTCTTACCCCATGTTCTGATCTTCCAGG**CTGAATTTACACCAGAAGAAGTTGATTCAA  
SWCC8 TTTCTTACCCCATGTTCTGATCTTCCAGGCTGAATTTACACCAGAAGAAGTTGATTCAA  
\*\*\*\*\*

CC3 GGAAGCGTCTGCTGAAGCTTGAAG**TACGTTTCCAAGTTTCAACTTACGTTTCATTATTT**  
SWCC8 GGAAGCGTCTGCTGAAGCTTGAAGTACGTTTCCAAGTTTCAACTTACGTTTCATTATTT  
\*\*\*\*\*

CC3 **TGTTATTGAACTTTTCTCTGTTTGTATGAATGGTATAGTTTTTCATTTCGGTGTGTGTA**  
SWCC8 TGTTATTGAACTTTTCTCTGTTTGTATGAATGGTATAGTTTTTCATTTCGGTGTGTGTA  
\*\*\*\*\*

CC3 **GATAGGAGCAATAATGAGCATGATTGCTAATATTGAATTGATTCTTAACGTTTCGCATAGT**  
SWCC8 GATAGGAGCAATAATGAGCATGATTGCTAATATTGAATTGATTCTTAACGTTTCGCATAGT  
\*\*\*\*\*

CC3 **TACATTTTTCTACTTTAATGAGAAAAAATCTCCAGCTTTAATGGATGGTTAAACAATT**  
SWCC8 TACATTTTTCTACTTTAATGAGAAAAAATCTCCAGCTTTAATGGATGGTTAAACAATT  
\*\*\*\*\*

CC3 **CAGTAAAACCTATGCATCATACCATCATCAGCCAACCATTTGGTAAGTACTGACCTCATC**  
SWCC8 CAGTAAAACCTATGCATCATACCATCATCAGCCAACCATTTGGTAAGTACTGACCTCATC  
\*\*\*\*\*

CC3 **TTTTAGGGTATGTACTGAAACATATATTAGACACTCTTTTTCGAGAAGCATAAECTTTTT**  
SWCC8 TTTTAGGGTATGTACTGAAACATATATTAGACACTCTTTTTCGAGAAGCATAAECTTTTT  
\*\*\*\*\*

CC3 **CTGTTGACAGCAGCCTACATTGGAATAATAATTGATTCTGTTTAATTAGG**ATGATCCAGA  
SWCC8 CTGTTGACAGCAGCCTACATTGGAATAATAATTGATTCTGTTTAATTAGGATGATCCAGA  
\*\*\*\*\*

CC3 TGAATCAACATCTATGCTACCTCTTGTGAAGCGAAGAAAGGGTCCCAGCAATTTGCAGA  
SWCC8 TGAATCAACATCTATGCTACCTCTTGTGAAGCGAAGAAAGGGTCCCAGCAATTTGCAGA  
\*\*\*\*\*

CC3 TCAAAACAAGATGACCAAACTCTTAATGAATCATCACTGACTAAGCTTGTGGTGCAGT  
SWCC8 TCAAAACAAGATGACCAAACTCTTAATGAATCATCACTGACTAAGCTTGTGGTGCAGT  
\*\*\*\*\*

CC3 AGATATGTATAATCTGGATGTAAGTCACATCACTATCTAATTTTATAAATTATCCATCACA  
SWCC8 AGATATGTATAATCTGGATGTAAGTCACATCACTATCTAATTTTATAAATTATCCATCACA  
\*\*\*\*\*

CC3 CATGATGAGTAAGGTTTCCCTCTTTGTGCGTTACTTATTGGAGAGTGTTTATATGAATTT  
SWCC8 CATGATGAGTAAGGTTTCCCTCTTTGTGCGTTACTTATTGGAGAGTGTTTATATGAATTT  
\*\*\*\*\*

CC3 TTCAGGAAATGGAGCCTCCACCTACACTAACCTGTGATCTTAGGCCTTATCAAAGCAAG  
SWCC8 TTCAGGAAATGGAGCCTCCACCTACACTAACCTGTGATCTTAGGCCTTATCAAAGCAAG  
\*\*\*\*\*

CC3 CTCTATTCTGGATGCTGAGTTGGAGAAGGGGATCGATGTTGAGAAGGCCGCACAAACC  
SWCC8 CTCTATTCTGGATGCTGAGTTGGAGAAGGGGATCGATGTTGAGAAGGCCGCACAAACC  
\*\*\*\*\*

CC3 TTCATCCATGCTGGTCAGCCTACCCTATCTGTGATGAGTAAGTATCTTTTACTAAAAGAA  
SWCC8 TTCATCCATGCTGGTCAGCCTACCCTATCTGTGATGAGTAAGTATCTTTTACTAAAAGAA  
\*\*\*\*\*

CC3 AAAGGAAAAGAAAAAAGGAACCCCTTGATTTTGGTGTCTCGTGTGGCACGGAATGAGA  
SWCC8 AAAGGAAAAGAAAAAAGGAACCCCTTGATTTTGGTGTCTCGTGTGGCACGGAATGAGA  
\*\*\*\*\*

CC3 TGAATTGTTTCCACTTTGTAGGAGAGCAACCTCAATCTATGTAACATTTTCTCTGGGGA  
SWCC8 TGAATTGTTTCCACTTTGTAGGAGAGCAACCTCAATCTATGTAACATTTTCTCTGGGGA  
\*\*\*\*\*

CC3 ATCAACTACAAAATCCCAACTGCAACACAGATGGCAAGAGGAGGAGTAAGAATAACCCC  
SWCC8 ATCAACTACAAAATCCCAACTGCAACACAGATGGCAAGAGGAGGAGTAAGAATAACCCC  
\*\*\*\*\*

CC3 ATGATTGAAATTTGAATAACCTTATGGAACCTATTTTCATTGATAGGCAGGTAGGATATAG  
SWCC8 ATGATTGAAATTTGAATAACCTTATGGAACCTATTTTCATTGATAGGCAGGTAGGATATAG  
\*\*\*\*\*

CC3 TTGATATTGTGCTTAACCTCATTGATACGTAAGTGTAGATTCTCGCGGATGCAATGGGGCT  
SWCC8 TTGATATTGTGCTTAACCTCATTGATACGTAAGTGTAGATTCTCGCGGATGCAATGGGGCT  
\*\*\*\*\*

CC3 TGGAAAGACGGTTATGACAATTGCTCTTATACTTGCAGGATGGGCAAGGATGCCCTGA  
SWCC8 TGGAAAGACGGTTATGACAATTGCTCTTATACTTGCAGGATGGGCAAGGATGCCCTGA  
\*\*\*\*\*

CC3 TAACCAAAGTCCACAGTGAATAAGAAAGTAACCACAGAGAAAAAAGTCAGAAATCCAC  
SWCC8 TAACCAAAGTCCACAGTGAATAAGAAAGTAACCACAGAGAAAAAAGTCAGAAATCCAC  
\*\*\*\*\*

CC3 GACTAAAGCAAGGGGTGGCACCTTATTGTTGTCCAATGGCTTTGCTGGGTCAATGGAA  
SWCC8 GACTAAAGCAAGGGGTGGCACCTTATTGTTGTCCAATGGCTTTGCTGGGTCAATGGAA  
\*\*\*\*\*

CC3 GGTAACATCCTCTGCAAGTTCATGATGTCCTTTTGTTTTACATTTAAAAGCATGATTA  
SWCC8 GGTAACATCCTCTGCAAGTTCATGATGTCCTTTTGTTTTACATTTAAAAGCATGATTA  
\*\*\*\*\*

CC3 CTTTACACTTGGTGATGCTGAAAGGAAGTGGGTTGATCCTAGTAGTAATAACTATCAAAC  
SWCC8 CTTTACACTTGGTGATGCTGAAAGGAAGTGGGTTGATCCTAGTAGTAATAACTATCAAAC  
\*\*\*\*\*

CC3 TGAACAATAAAATGCAATTGCATTTCTTAAACTTATGATTTAATCGAATTTTGCTACCAC  
SWCC8 TGAACAATAAAATGCAATTGCATTTCTTAAACTTATGATTTAATCGAATTTTGCTACCAC  
\*\*\*\*\*

CC3 AGGAGGAACTTGAATAACATTCAGAGCCTGAAAGTATTTCCATATTTGTTTCATTATGGTG  
SWCC8 AGGAGGAACTTGAATAACATTCAGAGCCTGAAAGTATTTCCATATTTGTTTCATTATGGTG  
\*\*\*\*\*

CC3 GTGATAGAATAACAACCCGGAGGTGCTATTAGGATATGATGTTGTATTGACAACGTATG  
SWCC8 GTGATAGAATAACAACCCGGAGGTGCTATTAGGATATGATGTTGTATTGACAACGTATG

\*\*\*\*\*  
CC3 GTGTCCCTAACATCGGCCTATAAGAGTGTGAGTAATTGTTTATAAGCTAGTTTCAACTTTA  
SWCC8 GTGTCCCTAACATCGGCCTATAAGAGTGTGAGTAATTGTTTATAAGCTAGTTTCAACTTTA  
\*\*\*\*\*  
CC3 TAGTATACATGTTGACACTAGTCAATTCCCTCTTATCTATTCTCCAATATTATTAACTTTT  
SWCC8 TAGTATACATGTTGACACTAGTCAATTCCCTCTTATCTATTCTCCAATATTATTAACTTTT  
\*\*\*\*\*  
CC3 CTATCTGTTTTATGGTCCATTCACTTCTAATTCAGGATGGAGAGTTAGTATTTACCACA  
SWCC8 CTATCTGTTTTATGGTCCATTCACTTCTAATTCAGGATGGAGAGTTAGTATTTACCACA  
\*\*\*\*\*  
CC3 GAGTTGATTGGTACAGAGTTGTGTAGATGAAGCCCATACAATTAATCATCAAAGACAC  
SWCC8 GAGTTGATTGGTACAGAGTTGTGTAGATGAAGCCCATACAATTAATCATCAAAGACAC  
\*\*\*\*\*  
CC3 AAAGTGCACAGGCTGCCTTTACTGAACTCATATTGTCGCTGGTGTCTTACTGGAACCC  
SWCC8 AAAGTGCACAGGCTGCCTTTACTGAACTCATATTGTCGCTGGTGTCTTACTGGAACCC  
\*\*\*\*\*  
CC3 CCCTCCAGTCCAATTCCCAACTTTTTTCCCTACTACTTTGTCAATAACGTCCTCCTTGGG  
SWCC8 CCCTCCAGTCCAATTCCCAACTTTTTTCCCTACTACTTTGTCAATAACGTCCTCCTTGGG  
\*\*\*\*\*  
CC3 CATTATGTGGCTTCCGAAACAATGATAAATAGTTTGTCTTTCATATTCGCTTTGCTCCA  
SWCC8 CATTATGTGGCTTCCGAAACAATGATAAATAGTTTGTCTTTCATATTCGCTTTGCTCCA  
\*\*\*\*\*  
CC3 TAAACTTGGCATCTCTTATTCAATCTTTTTAAGAGAGTAAAACGGAGAGTTCGAAGATAA  
SWCC8 TAAACTTGGCATCTCTTATTCAATCTTTTTAAGAGAGTAAAACGGAGAGTTCGAAGATAA  
\*\*\*\*\*  
CC3 GGATTATTTTATAAATTTGTGGTCTAGCATCTTATTCAAACCGTGTCTTCTTCTTGCTAC  
SWCC8 GGATTATTTTATAAATTTGTGGTCTAGCATCTTATTCAAACCGTGTCTTCTTCTTGCTAC  
\*\*\*\*\*  
CC3 AGAATAACCTGGAAGACCTTTTCAGCCTGTTATGCTTCTTGCAGTGAACCGTGGTGCA  
SWCC8 AGAATAACCTGGAAGACCTTTTCAGCCTGTTATGCTTCTTGCAGTGAACCGTGGTGCA  
\*\*\*\*\*  
CC3 ATTGGGCATGGTACAAGATGGAAGTTTTAATCTATCTTTTTTCAGTACACCATATTTTGA  
SWCC8 ATTGGGCATGGTACAAGATGGAAGTTTTAATCTATCTTTTTTCAGTACACCATATTTTGA  
\*\*\*\*\*  
CC3 TTTTAAGTTGGATTGCTCATGCTGAATCTTCTATCCCCTCCTGGCATTTTGGCTTTGGA  
SWCC8 TTTTAAGTTGGATTGCTCATGCTGAATCTTCTATCCCCTCCTGGCATTTTGGCTTTGGA  
\*\*\*\*\*  
CC3 TAGGTGGAACAAGTTGATTCAAAGGCCTTATGAAAATGGTGATCCTAGAGGCTTGAGATT  
SWCC8 TAGGTGGAACAAGTTGATTCAAAGGCCTTATGAAAATGGTGATCCTAGAGGCTTGAGATT  
\*\*\*\*\*  
CC3 GATCAAGGCTATCCTGAGGCCACTCATGTTGAGGAGAACTAAAGATACAAACGATGCAAA  
SWCC8 GATCAAGGCTATCCTGAGGCCACTCATGTTGAGGAGAACTAAAGATACAAACGATGCAAA  
\*\*\*\*\*  
CC3 CGGAAGGTAGTTCTTACGTTCTTGCAACATTCTCACAATATAATGTTCCCTCCTGGATCT  
SWCC8 CGGAAGGTAGTTCTTACGTTCTTGCAACATTCTCACAATATAATGTTCCCTCCTGGATCT  
\*\*\*\*\*  
CC3 AAAGCATGTGACATTGAACTCATCTGATGCAGGCCTATTCTTGTCTTCTCCTACTGAT  
SWCC8 AAAGCATGTGACATTGAACTCATCTGATGCAGGCCTATTCTTGTCTTCTCCTACTGAT  
\*\*\*\*\*  
CC3 ATTCAAACCGTCATGTGTGAACAGTCTGAGGCTGAACATGATTTTTATGATGCACTTTTT  
SWCC8 ATTCAAACCGTCATGTGTGAACAGTCTGAGGCTGAACATGATTTTTATGATGCACTTTTT  
\*\*\*\*\*  
CC3 AAGAAATCAAAGTAAAGTTTTGTTAGACTAGACTGCTCTTTGTTATACTAACTGAAG

SWCC8 AAGAAATCAAAAGTAAGTTTTTGTGTAGACTAGACTGCTCTTTTGTATACTAACTGAAG  
\*\*\*\*\*

CC3 AAGCGAAGAGAAGAAGATCTAACACCTTATTCTTTTTCCCTGTTAATTCACAAGTAGAT  
SWCC8 AAGCGAAGAGAAGAAGATCTAACACCTTATTCTTTTTCCCTGTTAATTCACAAGTAGAT  
\*\*\*\*\*

CC3 TAGTGGCTCTCTTTTATCCTTAAACATGCTACTCACTATCCCTTTATTTGAATCAACAGG  
SWCC8 TAGTGGCTCTCTTTTATCCTTAAACATGCTACTCACTATCCCTTTATTTGAATCAACAGG  
\*\*\*\*\*

CC3 TCCAGTTTGACCAGTTTGTAGCACAGGAAAGGTTCTCCACAACATGCAAAACATCCTCG  
SWCC8 TCCAGTTTGACCAGTTTGTAGCACAGGAAAGGTTCTCCACAACATGCAAAACATCCTCG  
\*\*\*\*\*

CC3 AGCTCTTGCTTCGACTTAGGCAGTGTGCAACCACCCATTTCTTGTAAATGAGGTTGGAAT  
SWCC8 AGCTCTTGCTTCGACTTAGGCAGTGTGCAACCACCCATTTCTTGTAAATGAGGTTGGAAT  
\*\*\*\*\*

CC3 AGGCAAAAGGAAAAGAAAAGAAAACAGAACACATGGTTTCTTTCTTGTGAAATCTATTG  
SWCC8 AGGCAAAAGGAAAAGAAAAGAAAACAGAACACATGGTTTCTTTCTTGTGAAATCTATTG  
\*\*\*\*\*

CC3 CAAACAATTTGATACTTTTGGTTTGATAAATGCAGCCGAGGAGATTCACAACAATATGCC  
SWCC8 CAAACAATTTGATACTTTTGGTTTGATAAATGCAGCCGAGGAGATTCACAACAATATGCC  
\*\*\*\*\*

CC3 AACTTAAACAAGCTTGCAAGAAAGTTCCTTGAATCCAACACTAATTTACAACAATGGAG  
SWCC8 AACTTAAACAAGCTTGCAAGAAAGTTCCTTGAATCCAACACTAATTTACAACAATGGAG  
\*\*\*\*\*

CC3 CAGGTTGCACCAACTCGAGCATATGTCGAAGATGTTGTCGAGTGCATTCGGCGAGGGGAA  
SWCC8 CAGGTTGCACCAACTCGAGCATATGTCGAAGATGTTGTCGAGTGCATTCGGCGAGGGGAA  
\*\*\*\*\*

CC3 AACACTGAGTGTCCAATATGTTTGAATTTGCTGACGATGCAGTGCACCCCATGTGCT  
SWCC8 AACACTGAGTGTCCAATATGTTTGAATTTGCTGACGATGCAGTGCACCCCATGTGCT  
\*\*\*\*\*

CC3 CACAGGATGTGTAGGGAATGTCTCCTCTCGAGCTGGAGGACCCACATGTGGGTTCTGC  
SWCC8 CACAGGATGTGTAGGGAATGTCTCCTCTCGAGCTGGAGGACCCACATGTGGGTTCTGC  
\*\*\*\*\*

CC3 CCAATTTGTAGGCAAATGCTGAGGAAAAGTGAAGTGCATAACATGTCCATCAGAAAGCCCT  
SWCC8 CCAATTTGTAGGCAAATGCTGAGGAAAAGTGAAGTGCATAACATGTCCATCAGAAAGCCCT  
\*\*\*\*\*

CC3 TTCCGTGTGGATGTTGAGAAGAACTGGAAGGAGTCTTCAAAGTATCAAAGTGTGAA  
SWCC8 TTCCGTGTGGATGTTGAGAAGAACTGGAAGGAGTCTTCAAAGTATCAAAGTGTGAA  
\*\*\*\*\*

CC3 TGCTTGGAGAGGATTAATCTGTTGGGTTCTGGTGAAAAGAGCATTGTTTTAGCCAGTGG  
SWCC8 TGCTTGGAGAGGATTAATCTGTTGGGTTCTGGTGAAAAGAGCATTGTTTTAGCCAGTGG  
\*\*\*\*\*

CC3 ACTACGTTTTTTGATCTCTTAGAGATTCCTTGAAGAGGAAAAGAAATGGATCTTCAGA  
SWCC8 ACTACGTTTTTTGATCTCTTAGAGATTCCTTGAAGAGGAAAAGAAATGGATCTTCAGA  
\*\*\*\*\*

CC3 TTTGATGGGAAGCTGTGCGAGAAACATAGGGAAGAGTCTTAAAGGAGTTCAGTGAAGC  
SWCC8 TTTGATGGGAAGCTGTGCGAGAAACATAGGGAAGAGTCTTAAAGGAGTTCAGTGAAGC  
\*\*\*\*\*

CC3 AAGGAGATAAAGGTATAATATGAAATTTACTACTCTGTTTTTAAGCCTTTTTATTTCAA  
SWCC8 AAGGAGATAAAGGTATAATATGAAATTTACTACTCTGTTTTTAAGCCTTTTTATTTCAA  
\*\*\*\*\*

CC3 ATTTCCAACCTCCATTATTCCTCTTCCAATTTAGGTGATGCTGATTTCTCTAAAAGCTG  
SWCC8 ATTTCCAACCTCCATTATTCCTCTTCCAATTTAGGTGATGCTGATTTCTCTAAAAGCTG  
\*\*\*\*\*

CC3 GTGGGGTTGGATTGAATCTAACCGCAGCATCAAATGTCTTCATAATGGTAATTCATGTTA  
SWCC8 GTGGGGTTGGATTGAATCTAACCGCAGCATCAAATGTCTTCATAATGGTAATTCATGTTA  
\*\*\*\*\*

CC3 GACTCAAGTTATTTTTCTCCTGAGTCAATGCATATTAAGTTTTGTACCATAATCTTAG  
SWCC8 GACTCAAGTTATTTTTCTCCTGAGTCAATGCATATTAAGTTTTGTACCATAATCTTAG  
\*\*\*\*\*

CC3 GATCCATGGTGAATCCCGCGGTTGAGGAACAAGCAATCATGAGGATTCATCGTATTGGT  
SWCC8 GATCCATGGTGAATCCCGCGGTTGAGGAACAAGCAATCATGAGGATTCATCGTATTGGT  
\*\*\*\*\*

CC3 CAGAAGAGGAGAGTCCGAGTCAGAAGATTCATTGTCAAGGTCACACAAATCTTCTTTCT  
SWCC8 CAGAAGAGGAGAGTCCGAGTCAGAAGATTCATTGTCAAGGTCACACAAATCTTCTTTCT  
\*\*\*\*\*

CC3 TCTGTTGTATATAAAATTTGACGTCATAAAAGAAACCAAATCAAAGGTCAAAAGTCAAAA  
SWCC8 TCTGTTGTATATAAAATTTGACGTCATAAAAGAAACCAAATCAAAGGTCAAAAGTCAAAA  
\*\*\*\*\*

CC3 CTTGTAATTTTGTAAAAATGTGAAGTTGACCCACGTGGACAGGACACAGTGGAGGAACG  
SWCC8 CTTGTAATTTTGTAAAAATGTGAAGTTGACCCACGTGGACAGGACACAGTGGAGGAACG  
\*\*\*\*\*

CC3 CATGCAACAAGTTCAAGCCAGAAAGCAACGGATGATCGCCGGTGCACCTCACTGACGAGGA  
SWCC8 CATGCAACAAGTTCAAGCCAGAAAGCAACGGATGATCGCCGGTGCACCTCACTGACGAGGA  
\*\*\*\*\*

CC3 AGTTAGAACGGCCAGAATTGAAGAACTCAAGATGCTATTTAGATGA  
SWCC8 AGTTAGAACGGCCAGAATTGAAGAACTCAAGATGCTATTTAGATGA  
\*\*\*\*\*

## Supplemental file 2

Complementary DNA (cDNA) sequences of cucumber genes *SH1*, *CsHY5*, *CsCOP1*, and *CsUVR8* used in yeast two-hybrid assay.

### >ADCsHY5

AATGCATACATACGACGTACCAGATTACGCTCATATGGCCATGGAGGCCAGTGAATTCATGCAGGAGCAAGC  
GACGAGTTCAGCCGCCGCTAGTTCTCTGCCTTCGAGCAGTGAAAGATCTCCAGCTCTGCTCTTCACTCGA  
AGTTAAAGAAGGAATGGAGAGCGATGAGGAGATCCGGAGAGTGCCGGAGATAGGCGGGGAATCGGCGG  
GAACATCGGCTTCGGGAGGGATACTGGTTCGGTAGCCGGTCCGGACCGGGTCAAGTTTCTCGGGAGGG  
TCAAAGGAAAAGAGGGAGAAGTCCGGCTGATAAAGAAAAGCAAGAGACTCAAGAGATTGCTGAGGAATAG  
GGTATCGGCACAGCAAGCAAGGGAGAGAAAAAGGCGTATTTGAATGATTTAGAGATAAGGGTGAAGGAT  
TTGGAGAAGAAGAACTCTGAACCTGAAGAAAGGCTTTCCACTTTACAGAATGAGAATCAGATGCTTAGACA  
AATTTTGAAGAACACAACGGCAAGTAGGAGAAGCGGTGAGTGAGGATCCATCGAGCTCGAGCTGCAGATG  
AATCGTAGATACTGAAAAACCCGCAAGTTCACCTCAACTGTGCATCGTGCACCATCTCAATTTCTTTCATTTA  
TACATCGTTTTGCCTTCTTTTATGTAACATACTCCTCTAAGTTTCAATCTTGGCCATGTAACCTCTGATCTATAG  
AATTTTTTAAATGACTAGAATTAATGCCATCTTTTTTTGGACCTAAATCTTCATGAAAAATATATTACGAGGG  
CTTATTCAGAAGCTTTGGACTTCTTCGCCAGAGGTTTGGTCAAGTCTCCAATCAAGGTTGTCGGCTTGCTAC  
CTTGCCAGAAATTTACGAAAAGATGGAAAAGGTCAAATCGTTGGTAGATACGTTGTTGACACTTCTAAATA  
AGCGAATTTCTATGATTTATGATTTTTATTATAAATAAGTTATAAAAAAATAAGTGTATACAAATTTTAAAGT  
GACTCTTAGGTTTTAAACGAAAATCTTATTCTTGAGTAACTTTTCTGTAGGTCAGGTTGCTTTCTCAGGT  
ATAGCATGAGGTCGCTCTTATTGACCACACCTTACCGGGCCGGTTCGAAATTCCTTACCCTATGAACATATTC  
CATTTTTGGAATTTCCGGGGCCGTTCTATTATGGAATTTCAATTTATAAAGTTTATGGACAAATATCATAAAAA  
AAGGAAAATCTTTTTAAGCAAGGATTTCTTAACTTCTTCCGGCGACAGGATCCCC

### >ADCsCOP1

TACGACGTACCAGATTACGCTCATATGGCCATGGAGGCCAGTGAATTCATGGACGACGGATCAACCGGAGCC  
TTAGTTCGGCGGTGAAGACGGAGCCGGTGTCTTCATCCATTTAGCTCCGTCAATTCCTGATTGCTCACTTG  
CCGAGCTCGGCACCGTCTTCGAGGCTTCAGCTCAGCTAGACAAGGACTTCTCTGCCAATTTGCATGCAGA  
TCATTAGGGATGCGTTCCTCACTGCCTGCGGTCACAGTTTCTGTTACATGTGTATCATCACTCATCTTCGCAAC  
AAGAGTGATTGCCCTTGCTGTGCTCAACATCTCACCTCTGACCAGCTGTTTCTTAACCTTTTCTGTTGATAAGCT  
ACTGAAGAAGACATCTGCACATCAAATAGCAAAAAGTCAACCCCATTTGAACTTTTTCTGCATGCTTTACAA  
GAGGGTTGTAATGTGTCAATTAAGGAGTTGGATTCCCTCTTGCAATGCTTTCTGAGAAGAAGAGAAAAGAT  
GGAACAAGAAGAATCGGTTAGAAATATGAAAATTTAACAGATTTCTTGCAATGCTGAGGAAGCAAAAAG  
TTAGCGAGCTCAATGAGGTGCAAATGATCTCCAGTTTATTAAGGAGGACATAAGTGCAGTGGAGAGACATC  
GGATGGAGCTGTCTCGTGAAGGGATAGGTAATCCATGAAGCTACGCAAGGCTGGAGATGATATGAAAGCG  
AGAGAACCTTGTTAACATTAATGGATAAGAGAAATGATGGGCCTACCTCAACTTCTTTGAACACCTGGGGT  
GTTGTGTCTGCCGGAATTTTCAAAAACAAGAAAGCAGATTCAAGGAGTCAAGTCAAGTCACTTATGGACTCTA  
CAAAAAGGATTCATTAAGTGGGGCAGAACCACAAGTGAATCATACTGGTCTATCCGTTGCAAGGAAAAAAC  
GTGTCCATGTTCAAGTCAATGACCTCCAAGAATGTTATCTGCAAAAAGCGACTTCAGCTGCCAAACCAACTGC  
TTGATCAACAGGAAAAGGGTTAAAATGTTATGCCAGAGAAGGATTTAATCCAGGCCTTTTCAGATTTTCAA  
TCAGTATTGACTACCTTACACGATCCAGTCGCTTGAGAGTCAATGCTGAACTTAGACATGGGGACTTATTTT  
ACAACACCAACATAGTATCAAGCATTGAATTTGACCGAGATGATGAGTTATTTGCTACTGCTGGTGTCTCG  
ATGCATAAAAGTCTTTGACTTCTTTCGGTTGTTAATGAACCTCCTGATGCCACTGTCTATAGTGAAATGT  
CAACACGTGCAAAATTAAGTTGCTTGAGTTGGGACAAAACAATCAAAAACATAATAGCTAGCAGCGACTATGA

GGGTATAGTAACAGTTTGGGATGTAATAGAGGGCAGAGTGTGATGGAGTACGAAGAGCATGAAAAGCGT  
ACTTGGAGTGTTGATTTTTCTCGTACAGAACCGTCAAGGCTGGTGTCTGGTAGTGATGATTGCAAGGTCAAA  
GTTTGGTGCATGAAACAGGAGGCCAGTGTCTTGATATCGACATGAAAGCCAATATATGTTGTGTCAAATTCA  
ATCCTGGATCTGGCAATCACATAGCTGTTGGTTCAGCAGATCATAATTCATTATTATGATCTAAGAAACATCA  
GCCATCCACTTCACGTCTTCACCGGTCACAAAAAGCTGTGTCATATGTAAAATTTCTATCGAACAGTGAGCT  
TGCTTCTGCATCTACTGACAGCACTTTACGATTATGGGATGTAAAGGAAAATCTGCCAGTTCGGACCTTTAGA  
GGCCATACAAATGAGAAAACTTTGTTGGTCTGACCGTGAACAACGAATACATTGCTTGTGGCAGCGAGAC  
AAATGAAGTCTTTGTCTACCACAAGGAAATATCCCGACCACTGACGTGGCATAGGTTCCGTTACCTGATGTA  
ACTGATGTAGAGGATGATGTGGGATCTTATTTTCATCAGTGCTGTTTCTGGAAGAGTGACAGTCTACTATCC  
TCACGGCTAACAGTCAGGGAACAATTAAGGTGCTGGTCTTTCGCGTTTAAGGATCCATCGAGCTCGAGCTG  
CAGATGAATCGTAGATAC

**>ADCsUVR8**

TACGACGTACCAGATTACGCTCATATGGCCATGGAGGCCAGTGAATTCATGGAAGCGACTTCTCCAGTTCGT  
CGTGTGCTTTTCATCTCCGCGGGTGTAGTCATTCGGTTGCTCTTCTTTCTGGAATATGTTTGTCTTGGGG  
ACGTGGAGAAGATGGTCAATTAGGTCATGGAGATGCTGAAGATCGATTGTCACCAACACAATTGAGTGCATT  
GGATGGCCATGAAATAGTATCTGTTACTTGTGGAGCTGATCATAACAGCTTATTCTGTAGCACGAACAGAA  
GTTTATAGTTGGGGATGGGGTGACTTTGGGAGGTTAGGTCATGGTAATTCTAGTGATTTGTTTACACCGAAG  
CCAATTAAGCATTGCATGGTCTTAAGATAAGGCAAATTGCTTGTGGAGATAGCCACTGCTTGGCGGTA  
ACTATGGAAGGCGAGGTGCAGAGTTGGGGAAGGAATCAAATGGTCAACTTGGTCTTGGTACCACCGAAGACT  
CTCTTGTGCCGAGAAAATCCAAGCATTGAGGGAATATCTATAAAAATGGTAGCTGCAGGTGCTGAACATA  
CTGCTGCTGTCACGGAAGATGGGGAGCTCTTTGGATGGGGCTGGGGCCGGTATGGAACTTAGGGTTAGG  
TGACAGAAACGATCGATTGGTGCCCCAGAAAGTTTCTTCTGTTGATGGTGACAAGATGGTGATGGTTGCTTG  
TGGATGGCGGCATACGATATCAGTTTCTCTTGGGTGGATTATACACCTATGGATGGAGCAAATATGGACAA  
CTAGGACATGGAGATTTTGGAGTGCCTTGTGCCTCACAGGCTAGAAGCATTGCGTGGAGATAATATTTCT  
CAGATATCAGGTGGTTGGAGGCATACAATGGCACTTACAACCTGATGGAAAATGATGGATGGGGCTGGAA  
CAAGTTTGGGCAGGTTGGAGCTGGTGATAACATTGATCATTGCTCTCCGATACAAATAAAGTTTCCCCAGGA  
CCAGAAAGTAATTCAGATCTCATGTGGATGGAGGCACACACTAGCTGTTACTGATAAGCAAATGTGTTTTCT  
TGGGGTAGAGGTACAAATGGACAGCTTGGACATGGGGAGTCAGTTGATCGGAACACACCAATGATCCTCGA  
AGCTTTGAGCGTTGATGGTTGTAGTGGTCAACAGATTGAATCCTCAAATATAGATCCGTCTTCAGGAAAAAC  
TTGGGTATCGCCAACAGAAAGATGCAATTGTTCTGATGAATCTGTACAGGTACAGGTACAGGGGCCATC  
AACATCTGTTAGGGGTAACGGGAGTGATGCCAACGTTCCCGAAAATGATGTAAAAAGGTTACGTGTCTGAG  
GATCCATCGAGCTCGAGCTGCAGATGAATCGTAGATAC

**>BDSH1**

GAGGAGGACCTGCATATGGCCATGGAGGCCGAATTCATGGAGGTAAACGCCATTCTAGAAGAGAAACTCAA  
AAAGATTCGATCTGTGGTTCGGCCTTGACTTTCCGATTCTTTTATTCATCGGACGTTGTGCGAGAAACGGCGG  
TGACCCTGATGAGGCTATTAAGTACATTCTCGAAAACCTGGGTTTTTGGCCAGGCCACTGTCTGTTGTACG  
GACTGTCACTAGCACCGGTGCTCGAGTTTCGACACAGTTCATGCAGAAGGATTCTATGGAGTCGGAGGAGG  
TAGCGAAACCGACGGTACAAGTGAAGGAGGAACCGGTTTAGGGCTCGAAGATAAAGGCATTGATAATTG  
GGGAGTAAGCTCGGATCGTTCAAAGGTCCTGGAACGTCGAAAATGACACTTGACGAGTTTCTTAAACCGA  
ATGCGATGAGCGATGAGGAGTATAGCAAGATCCTTAAGGAAATGGCGGCAGCGAAACCCAGTGCCAAGAAT  
AATGTAAAGGAGGAACCAAGTTGAGGCGATGGCGCAATCTGGTGTGGTACAAATGCGAGGGTAAAAAGAAG  
AACCAGATTTGGAGGTTAAGAACAGAGCATTGTCTAAAAAAGCAAGGTCGGAGACTGAAAATTTTGAATG



TCGGTTTCAAGCAATACAAGTGGCATGCAAAGGAATGGGACCTTTTCTAATGATGGGAGGTGCAAGATTGA  
AGATGGGGATTTCCCTATTGAGCCCGATTGGTTTTTGGTGGGAAGGACAGTGGTCACAGCCATGTCCACCA  
CGAAAGGGAATAAATTAGCAGATAATGAAATTGTTAATTTTGCCTTCTTCAAGTTCTAGATTCAATGC  
GCAATGGATTGTTGCTTCTCAACTAAAAGAAGTGGAGAGATTGGTCGCCTACCAATGGAGTGGGCAAAT  
GTGTAGTTCCACTTGTCAACTCCCAGAAAGTTAAAATTTCTGGACGATGTATAGCTGCACCAGGAAACCTTC  
ACATAATGCAAGAGATCCTTCTATATGTTAGCTTTTATATTATAATTTCAGTATTCTCAGACATTGATACAGTTAC  
ATGGAAGCTGGAGGCTACGCACATTGACTCTACAATTTATCCTTCTTACCCTTTTCAAATTACTGAAAATCA  
CACCGTACCAGAAGGCTGAATTTACACCAGAAGAACTTGATTCAAGGAAGCGTCTGCTGAAGCTGAAGAT  
GATCCAGATGAATCAACATCTATGCTACCTCTTGTGAAGCGAAGAAAGGGTTCCAGCAATTTGCAGATCAA  
AACAAAGATGACCAAACCTTAATGAATCATCACTGACTAAGCTTGTGGTGCAGTAGATATGTATAATCTGG  
ATGAAATGGAGCCTCCACCTACCTAACCTGTGATCTTAGGCCTTATCAAAGCAAGCTCTATTCTGGATGTC  
TGAGTTGGAGAAGGGGATCGATGTTGAGAAGGCCGCACAAACCTTCATCCATGCTGGTCAGCCTACCGTA  
TCTGTGATGAGAGAGCAACCTCAATCTATGTAACATTTTCTCTGGGGAATCAACTACAAAATTTCCAACTGC  
AACACAGATGGCAAGAGGAGGAATTTCTCGCGATGCAATGGGGCTTGAAAGACGGTTATGACAATTGCT  
CTTATACTTGCAGGATGGGCAAAGGATGCCCTGATAACCAAAGTCCACAGTGAATAAGAAAGTAACCAC  
AGAGAAAAAAGTCAGAAATCCACGACTAAAGCAAGGGGTGGCACCCCTATTGTTTTGTCCAATGGCTTTC  
TGGGTCAATGGAAGGAGGAACCTGAAATACATTCAGAGCCTGAAAGTATTTCCATATTTGTTCAATTATGGTGG  
TGATAGAATAACAACCCGGAGGTGCTATTAGGATATGATGTTGATTGACAACGTATGGTGCCTAACATCG  
GCCTATAAGAGTGATGGAGAGTTTAGTATTTACCACAGAGTTGATTGGTACAGAGTTGTGTTAGATGAAGCC  
CATACAATTAATCATCAAAGACACAACTGCACAGGCTGCCTTTACTGAACCTCATATTGTCGCTGGTGTGTC  
TTACTGGAACCCCTCCAGAATAACCTGGAAGACCTTTTCAGCCTGTTATGCTTCTTGCAGTGAACCGT  
GGTGAATTTGGGCATGGTGGAAACAAGTTGATTCAAAGGCCTTATGAAAATGGTGATCCTAGAGGCTTGAGA  
TTGATCAAGGCTATCCTGAGGCCACTCATGTTGAGGAGAACTAAAGATACAAACGATGCAAACGGAAGGCC  
TATTCTGTTCTTCTCCTACTGATATTCAAACCGTCATGTGTGAACAGTCTGAGGCTGAACATGATTTTTATGA  
TGCACTTTTTAAGAAATCAAAGTCCAGTTTGACCAGTTTGTAGCACAAGGAAAGGTTCTCCACAACATATGC  
AAACATCCTCGAGCTTGTCTCGACTTAGGCAGTGTGCAACCAACCCATTTCTTGAATGAGCCGAGGAGA  
TTCACAACAATATGCCAACTTAAACAAGCTTGAAGAAAGTTCTTGAATCCAACACTAATTCTACAACAATG  
GAGCAGGTTGCACCAACTCGAGCATATGTGAAGATGTTGTCGAGTGCATTCGGCGAGGGGAAAAACTG  
AGTGTCCAATATGTTTGAATTTGCTGACGATGCAGTGCTCACCCCATGTGCTCACAGGATGTGTAGGGAAT  
GTCTCCTCTCGAGCTGGAGGACCCcACATGTGGGTTCTGCCAATTTGTAGGCAAATGCTGAGGAAAACCTG  
AGCTCATAACATGTCCATCAGAAAGCCCTTTCCGTGTGGATGTTGAGAAGAACTGGAAGGAGTCTTCAAAA  
GTATCAAACTGCTGGAATGCTTGGAGAGGATTAATCTGTTGGTCTGGTGAAGAGCATTGTTTTTAGC  
CAGTGGACTACGTTTTTGTATCTCTTAGAGATTCCCTGAAAGAGGAAAAGAATTGGATTCTTCAGATTTGATG  
GGAAGCTGTCGCAGAAACATAGGGAAAGAGTTCTAAAGGAGTTCAGTGAAGCAAGGAGATAAAGGTGA  
TGCTGATTTCTAAAAGCTGGTGGGGTTGGATTGAATCTAACCGCAGCATCAAATGTCTTCATAATGGATCC  
ATGGTGAATCCCGCGTTGAGGAACAAGCAATCATGAGGATTCATCGTATTGGTCAGAAGAGGAGAGTCC  
GAGTCAGAAGATTCATTGTCAAGGACACAGTGGAGGAACGCATGCAACAAGTTCAAGCCAGAAAGCAACG  
GATGATCGCCGGTGCCTCACTGACGAGGAAGTTAGAACGGCCAGAATTGAAGAGCTCAAGATGCTATTTA  
GATGAGGATCCGTCGACCTGCAGCGGCCGATAACTAGCATAACCCCTTGGGGCCTCTAACGGGTCTTGA  
GGGTTTTTTCGCGCTGCAG

**>BDCsCOP1**

CAGAGCTGATCTCAGAGGAGGACCTGCATATGGCCATGGAGGCCGAATTCATGGACGACGGATCAACCGG

AGCCTTAGTCCGGCGGTGAAGACGGAGCCGGTGTCTTCATCCATTTCCAGCTCCGTCAATTCCTGATTGCTC  
ACTTGCCGAGCTCGGCACCGTCTTCGAGGCTTCAGCTCAGCTGGACAAGGACTTCCTCTGCCAATTTGCAT  
GCAGATCATTAGGGATGCGTTCCTCACTGCCTGCGGTACAGTTTCTGTTACATGTGTATCATCACTCATCTTC  
GCAACAAGAGTGATTGCCCTTGCTGTGCTCAACATCTCACCTCTGACCAGCTGTTTCTAACTTTTTGCTTGA  
TAAGCTACTGAAGAAGACATCTGCACATCAAATAGCAAAAAGTCAACCCCATTTGAACCTTTTTCGTCATGCT  
TTACAAGAGGGTTGTAATGTGTCAATTAAGGAGTTGGATTCCTCTTGGCAATGCTTTCTGAGAAGAAGAGA  
AAGATGGAACAAGAAGAATCGGTTAGAAATATGAAAATTTAACAGATTTCTTGCAATGCCTGAGGAAGCA  
AAAAGTTAGCGAGCTCAATGAGGTGCAATTGATCTCCAGTTTATTAAGGAGGACATAAGTGCAGTGGAGA  
GACATCGGATGGAGCTGTCTCGTGCAAGGGATAGGTAATCCATGAAGCTACGCAAGGCTGGAGATGATAG  
AAAGCGAGAGAACCTTGTTAACATTAATGGATAAGAGAAATGATGGGCCTACCTCAACTTCTTTGAACACC  
TGGGGTGTGTCTGCCGGGAATTTCAAACAAGAAAGCAGATTCAAGGAGTCAAGTCAGCACTTATGG  
ACTCTACAAAAGGATTCATTAAGTGGGGCAGAACCAAGTGAATCATACTGGTCTATCCGTTGCAAGGAA  
AAAACGTGTCCATGCTCAGTTCAATGACCTACAAGAATGTTATCTGCAAAAGCGACGTCAGCTGCCAAACCA  
ACTGCTTGATCAACAGGAAAAGGATAAAAATGTTATGCCAGAGAAGGATTTAATCCAGGCCTTTAGATTT  
TCAATCAGTATTGACTACCTTCACACGATACAGTCGCTTGAGAGTCATTGCTGAACCTAGACATGGGGACTTA  
TTTCAACACCAACATAGTATCAAGCATTGAATTTGATCGAGATGATGAGTTATTTGCTACTGCTGGTGTTC  
TCGATGCATAAAAGTCTTTGACTTCTCTTCGTTGTTAATGAACCTCTGATGCCACTGTCTATAGTGAAAA  
TGTC AACACGTGCAAAATTAAGTTGCTTGAGTTGGGACAAACAATCAAAAAACATAATAGCTAGCAGCGACT  
ATGAGGGTATAGTAACAGTTTGGGATGTAAATAGAGGGCAGAGTGTGATGGAGTACGAAGAGCATGAAAA  
GCGTGCTTGAGTGTTGATTTTTCTCGTACAGAACCGTCAAGGCTGGTGTCTGGTAGTGATGATTGCAAGGT  
CAAAGTTTGGTGCATGAAACAGGAGGCCAGTGTCTTGATATCGACATGAAAGCCAATATATGTTGTGTCAA  
ATTCAATCCTGGATCTGGCAATCACATAGCTGTTGGTTTCAGCAGATCATAATATTCATTATTATGATCTAAGAAA  
CATCAGCCATCCACTTCACGTCTTCACCGGTCAAAAAAAGCTGTGTCATATGTAAAATTTCTATCGAACAGT  
GAGCTTGCTTCTGCATCTACTGACAGCACTTACGATTATGGGATGTAAAGGAAAATCTGCCAGTTCGGACC  
TTTAGAGGCCATACAAATGAGAAAAACTTTGTTGGTCTGACCGTGAACAACGAATACATTGCTTGTGGCAGC  
GAGACAAATGAAGTCTTTGTCTACCACAAGGAAATATCCCGACCACTGACGTGGCATAGGTTCCGGTTCACCT  
GATGTAACCTGATGTAGAGGATGATGTGGGATCTTATTTTCATCAGTGCTGTTTGCTGGAAGAGTGACAGTCCTA  
CTATCCTCACGGCTAACAGTCAGGGAACAATTAAGGTGCTGGTCTTGCGGTTAAGGATCCGTCGACCTGC  
AGCGGCCGCATAACTAGCATAACCCCTTGGGGCCTCTAACGGGTCTTGAGGGGTTTTGCGCGCTGCAG
