# Supplementary material
Source: PubMed Central journal article supplement (PMC5047076)
Supplement: supp_pp.16.00501_PP2016-00501R1_Supplemental_tables.pdf [file supp_pp.16.00501_PP2016-00501R1_Supplemental_tables.pdf]

**Table S1** Cucumber materials used in the present study for genome-wide association and phylogenetic analysis at *SHORT HYPOCOTYL1 (Sh1)* locus

| #  | Accessions    | Botanical variety           | Geographic origin                       | Latitude | Longitude | Sh1 <sup>a</sup> | Groupings   | Seed/data source           | HL-UVB-free (cm) <sup>b</sup> | HL-LDUVB (cm) <sup>b</sup> |
|----|---------------|-----------------------------|-----------------------------------------|----------|-----------|------------------|-------------|----------------------------|-------------------------------|----------------------------|
| 1  | PI 183967     | C. s. var. hardwickii (CSH) | India, Meghalaya                        | 25.57    | 91.6      | B                | CSH-1       | This study                 | 14.5                          | 14.4                       |
| 2  | CG0001        | C. s. var. hardwickii (CSH) | India                                   | 24.8     | 93.2      | B                | CSH-2       | Qi et al. 2013             |                               |                            |
| 3  | CG0010        | C. s. var. hardwickii (CSH) | India                                   | 25.2     | 92.8      | B                | CSH-3       | Qi et al. 2013             |                               |                            |
| 4  | CG0011        | C. s. var. hardwickii (CSH) | India                                   | 25.8     | 91.3      | B                | CSH-4       | Qi et al. 2013             |                               |                            |
| 5  | CG0015        | C. s. var. hardwickii (CSH) | India                                   | 25.8     | 92.8      | B                | CSH-5       | Qi et al. 2013             |                               |                            |
| 6  | CG0003        | C. s. var. hardwickii (CSH) | India, Uttar Pradesh                    | 26.85    | 80.4      | A                | CSH-6       | Qi et al. 2013             |                               |                            |
| 7  | CG0004        | C. s. var. hardwickii (CSH) | India                                   | 25.5     | 80.8      | A                | CSH-7       | Qi et al. 2013             |                               |                            |
| 8  | PI 504564     | C. s. var. hardwickii (CSH) | India                                   | 20.5     | 78.6      | A                | CSH-8       | This study; Qi et al. 2013 | 41.8                          | 18.8                       |
| 9  | CG0014        | C. s. var. hardwickii (CSH) | India                                   | 26.2     | 81.3      | A                | CSH-9       | Qi et al. 2013             |                               |                            |
| 10 | CG0016        | C. s. var. hardwickii (CSH) | India                                   | 13.5     | 77.6      | A                | CSH-10      | Qi et al. 2013             |                               |                            |
| 11 | CG0017        | C. s. var. hardwickii (CSH) | India                                   | 12.2     | 77.4      | A                | CSH-11      | Qi et al. 2013             |                               |                            |
| 12 | PI 214155     | C. s. var. hardwickii (CSH) | India, Karnataka                        | 15.19    | 75.42     | B                | CSH-12      | This study; Qi et al. 2013 | 15.8                          | 15.6                       |
| 13 | IC-248323     | C. s. var. hardwickii (CSH) | India, Kankavalli Sindhurg Mah: 16.2    | 73.33    | A         |                  |             | This study, PS             |                               |                            |
| 14 | IC-248339     | C. s. var. hardwickii (CSH) | India, Sattichamad, Kohlapur M: 19.45   | 75.42    | A         |                  |             | This study, PS             | 56.0                          | 19.0                       |
| 15 | IC-256271     | C. s. var. hardwickii (CSH) | India, Malappattam Kannur Keral 12      | 75.29    | A         |                  |             | This study, PS             |                               |                            |
| 16 | IC-285515     | C. s. var. hardwickii (CSH) | India, Malakkapara Trissur Keral: 10.16 | 76.51    | A         |                  |             | This study, PS             |                               |                            |
| 17 | IC-336232     | C. s. var. hardwickii (CSH) | India, Muryan Nilgris Tamil Nadu 11.07  | 78.39    | A         |                  |             | This study, PS             |                               |                            |
| 18 | IC-336255     | C. s. var. hardwickii (CSH) | India, Kattikulam Wayned Kerala 11.48   | 76.03    | A         |                  |             | This study, PS             |                               |                            |
| 19 | IC-469509     | C. s. var. hardwickii (CSH) | India, Kodagu Karnataka                 | 12.2     | 75.48     | A                |             | This study, PS             |                               |                            |
| 20 | IC-469566     | C. s. var. hardwickii (CSH) | India, Karnataka                        | 15.19    | 75.42     | A                |             | This study, PS             |                               |                            |
| 21 | IHR-341A      | C. s. var. hardwickii (CSH) | India, IHR Bangalore                    | 13.09    | 77.31     | A                |             | This study, PS             |                               |                            |
| 22 | PI 462369     | C. s. var. hardwickii (CSH) | India                                   | 20.35    | 78.57     | A                |             | This study                 |                               |                            |
| 23 | Shimla        | C. s. var. hardwickii (CSH) | India, Shimla, Himachal Pradesh 31.06   | 77.1     | A         |                  |             | This study, TKB            |                               |                            |
| 24 | VRCHW-13-06   | C. s. var. hardwickii (CSH) | India, Umiam Meghalaya                  | 25.4     | 91.55     | A                |             | This study, PS             |                               |                            |
| 25 | IC-202060     | C. s. var. hardwickii (CSH) | India, Mussorie, Uttarakhand            | 30.27    | 78.04     | B                |             | This study, TKB            |                               |                            |
| 26 | IC-248263     | C. s. var. hardwickii (CSH) | India, Canacona North Goa Goa           | 15.3     | 73.58     | B                |             | This study, PS             |                               |                            |
| 27 | IC-248275     | C. s. var. hardwickii (CSH) | India, Madgav Goa Goa                   | 15.17    | 74.07     | B                |             | This study, PS             |                               |                            |
| 28 | IC-256188     | C. s. var. hardwickii (CSH) | India, Manjapra Ernakulam Keral 9.58    | 76.17    | B         |                  |             | This study, PS             |                               |                            |
| 29 | IC-285454     | C. s. var. hardwickii (CSH) | India, Manjapra Ernakulam Keral 10.12   | 76.27    | B         |                  |             | This study, PS             |                               |                            |
| 30 | IC-331444     | C. s. var. hardwickii (CSH) | India, Jeyepore, Orissa                 | 18.51    | 82.34     | B                |             | This study, TKB            |                               |                            |
| 31 | IC-331465     | C. s. var. hardwickii (CSH) | India, Shehdol, Madhya Pradesh 23.18    | 81.21    | B         |                  |             | This study, TKB            |                               |                            |
| 32 | IC-469591     | C. s. var. hardwickii (CSH) | India, South Goa Goa                    | 15.07    | 74.07     | B                |             | This study, PS             |                               |                            |
| 33 | PI 179678     | C. s. var. hardwickii (CSH) | India, Rajasthan                        | 26.55    | 93.5      | B                |             | This study                 | 25.8                          | 25.4                       |
| 34 | SEL1          | C. s. var. hardwickii (CSH) | India, Selakui Uttarakhand              | 30.22    | 77.51     | B                |             | This study, TKB            |                               |                            |
| 35 | SUKC-11-1B    | C. s. var. hardwickii (CSH) | India                                   | 15.6     | 74.3      | B                |             | This study, PS             |                               |                            |
| 36 | SUKC-11A      | C. s. var. hardwickii (CSH) | India                                   | 11.2     | 75.8      | B                |             | This study, PS             |                               |                            |
| 37 | VRCHW-13-01   | C. s. var. hardwickii (CSH) | India, Umiam Meghalaya                  | 25.4     | 91.55     | B                |             | This study, PS             |                               |                            |
| 38 | VRCHW-13-04   | C. s. var. hardwickii (CSH) | India, Agartala Tripura                 | 23.49    | 91.17     | B                |             | This study, PS             |                               |                            |
| 39 | VRCHW-13-05   | C. s. var. hardwickii (CSH) | India, Meghalaya                        | 25.28    | 91.21     | B                |             | This study, PS             |                               |                            |
| 40 | IC-248151     | C. s. var. hardwickii (CSH) | India, Telasherry Kannur Kerala         | 11.52    | 75.22     | H                |             | This study, PS             |                               |                            |
| 41 | IC-248349     | C. s. var. hardwickii (CSH) | India, Tharale Sindhurg Mahaz 16.2      | 73.33    | H         |                  |             | This study, PS             |                               |                            |
| 42 | IC-256248     | C. s. var. hardwickii (CSH) | India, Kannavam Kannur Kerala           | 11.5     | 75.39     | H                |             | This study, PS             |                               |                            |
| 43 | IC-557158     | C. s. var. hardwickii (CSH) | India, Jodhpur Rajsthan                 | 26.14    | 73.01     | H                |             | This study, PS             |                               |                            |
| 44 | IHR-341B      | C. s. var. hardwickii (CSH) | India, IHR Bangalore                    | 13.07    | 77.29     | H                |             | This study, PS             |                               |                            |
| 45 | PI 215589     | C. s. var. hardwickii (CSH) | India, Uttar Pradesh                    | 26.5     | 79.9      | H                |             | This study                 | 45.0                          | 19.0                       |
| 46 | SUKC-11-2B    | C. s. var. hardwickii (CSH) | India                                   | 26.51    | 73.02     | H                |             | This study, PS             |                               |                            |
| 47 | SUKC-11-C     | C. s. var. hardwickii (CSH) | India                                   | 25.72    | 73.6      | H                |             | This study, PS             |                               |                            |
| 48 | SUKC-5        | C. s. var. hardwickii (CSH) | India                                   | 24.9     | 73.1      | H                |             | This study, PS             |                               |                            |
| 49 | PI 605988     | C. s. var. sativus (CSS)    | India, Rajasthan                        | 28.1     | 75.6      | A                | India-1     | Qi et al. 2013             |                               |                            |
| 50 | PI 605991     | C. s. var. sativus (CSS)    | India, Rajasthan                        | 26.6     | 73.9      | A                | India-2     | Qi et al. 2013             |                               |                            |
| 51 | PI 606033     | C. s. var. sativus (CSS)    | India, Madhya Pradesh                   | 22.58    | 78.39     | B                | India-3     | This study                 |                               |                            |
| 52 | PI 606039     | C. s. var. sativus (CSS)    | India, Madhya Pradesh                   | 22.1     | 79.3      | B                | India-4     | This study                 |                               |                            |
| 53 | PI 605943     | C. s. var. sativus (CSS)    | India, Rajasthan                        | 27.4     | 74.3      | A                | India-5     | This study; Qi et al. 2013 | 61.0                          | 35.0                       |
| 54 | PI 605957     | C. s. var. sativus (CSS)    | India, Rajasthan                        | 26.5     | 73.4      | B                | India-6     | This study                 |                               |                            |
| 55 | CGN23002      | C. s. var. sativus (CSS)    | India                                   | 26       | 80        | A                | India-7     | This study; Qi et al. 2013 | 46.6                          | 13.4                       |
| 56 | PI 175120     | C. s. var. sativus (CSS)    | India, Khira                            | 20.35    | 78.57     | A                | India-8     | This study; Qi et al. 2013 | 45.0                          | 25.0                       |
| 57 | PI 504570     | C. s. var. sativus (CSS)    | India                                   | 26       | 76        | A                | India-9     | This study; Qi et al. 2013 | 21.6                          | 11.8                       |
| 58 | PI 173892     | C. s. var. sativus (CSS)    | India, Uttar Pradesh                    | 26.85    | 80.91     | A                | India-10    | Qi et al. 2013             |                               |                            |
| 59 | CG7023        | C. s. var. sativus (CSS)    | Iran                                    | 35.45    | 51.3      | B                | Eurasian-01 | Qi et al. 2013             |                               |                            |
| 60 | PI 482412     | C. s. var. sativus (CSS)    | Zimbabwe                                | -19.1    | 29.09     | A                | Eurasian-02 | Qi et al. 2013             |                               |                            |
| 61 | PI 500361     | C. s. var. sativus (CSS)    | Zambia                                  | -14.18   | 28.17     | A                | Eurasian-03 | Qi et al. 2013             |                               |                            |
| 62 | PI 500359     | C. s. var. sativus (CSS)    | Zambia                                  | -15.32   | 28.32     | A                | Eurasian-04 | This study; Qi et al. 2013 | 35.2                          | 15.5                       |
| 63 | PI 500365     | C. s. var. sativus (CSS)    | Zambia, Copperbelt                      | -12      | 28        | A                | Eurasian-05 | This study; Qi et al. 2013 | 80.0                          | 30.0                       |
| 64 | CGN20890      | C. s. var. sativus (CSS)    | Indonesia                               | -6.18    | 106.83    | A                | Eurasian-06 | This study; Qi et al. 2013 | 94.0                          | 20.0                       |
| 65 | CGN20517      | C. s. var. sativus (CSS)    | Sri Lanka                               | 7        | 81        | A                | Eurasian-07 | Qi et al. 2013             |                               |                            |
| 66 | PI 163213     | C. s. var. sativus (CSS)    | Pakistan, Punjab                        | 31       | 72        | A                | Eurasian-08 | This study; Qi et al. 2013 | 72.0                          | 15.0                       |
| 67 | WI7156        | C. s. var. sativus (CSS)    | Europe                                  | 35.2     | -115.3    | A                | Eurasian-09 | This study                 | 41.6                          | 17.3                       |
| 68 | PI 330628     | C. s. var. sativus (CSS)    | Pakistan                                | 33.66    | 73.16     | A                | Eurasian-10 | This study                 |                               |                            |
| 69 | PI 200815     | C. s. var. sativus (CSS)    | Myanmar, Mandalay                       | 21.96    | 96.08     | A                | Eurasian-11 | This study                 | 35.6                          | 14.4                       |
| 70 | CG5031        | C. s. var. sativus (CSS)    | Netherlands                             | 52.32    | 5.55      | A                | Eurasian-12 | Qi et al. 2013             |                               |                            |
| 71 | PI 288995     | C. s. var. sativus (CSS)    | Hungary                                 | 47.09    | 19.3      | A                | Eurasian-13 | Qi et al. 2013             |                               |                            |
| 72 | PI 326594     | C. s. var. sativus (CSS)    | Hungary                                 | 47.2     | 19.5      | A                | Eurasian-14 | Qi et al. 2013             |                               |                            |
| 73 | CG5278        | C. s. var. sativus (CSS)    | Netherlands                             | 47.4     | 19.2      | A                | Eurasian-15 | Qi et al. 2013             |                               |                            |
| 74 | CG5326        | C. s. var. sativus (CSS)    | Netherlands                             | 48.1     | 19.3      | A                | Eurasian-16 | Qi et al. 2013             |                               |                            |
| 75 | CG5420        | C. s. var. sativus (CSS)    | Poland                                  | 52.22    | 21.03     | A                | Eurasian-17 | Qi et al. 2013             |                               |                            |
| 76 | CG5479        | C. s. var. sativus (CSS)    | Russian Federation                      | 60       | 90        | A                | Eurasian-18 | Qi et al. 2013             |                               |                            |
| 77 | PI 263047     | C. s. var. sativus (CSS)    | Russian Federation, Altay               | 59       | 89.5      | A                | Eurasian-19 | This study; Qi et al. 2013 | 52.6                          | 15.8                       |
| 78 | PI 512596     | C. s. var. sativus (CSS)    | Spain, Teruel                           | 40.2     | -1.6      | A                | Eurasian-20 | Qi et al. 2013             |                               |                            |
| 79 | PI 338236     | C. s. var. sativus (CSS)    | Turkey, Kayseri                         | 38.43    | 35.28     | A                | Eurasian-21 | Qi et al. 2013             |                               |                            |
| 80 | CG5790        | C. s. var. sativus (CSS)    | ?                                       | 38.2     | 35.1      | A                | Eurasian-22 | Qi et al. 2013             |                               |                            |
| 81 | PI 172843     | C. s. var. sativus (CSS)    | Turkey, Mardin                          | 37.18    | 40.44     | A                | Eurasian-23 | Qi et al. 2013             |                               |                            |
| 82 | CG6508        | C. s. var. sativus (CSS)    | Puerto Rico                             | 18.45    | -66.1     | A                | Eurasian-24 | Qi et al. 2013             |                               |                            |
| 83 | CGN19579      | C. s. var. sativus (CSS)    | USA                                     | 38.88    | -77.02    | A                | Eurasian-25 | Qi et al. 2013             |                               |                            |
| 84 | CGN19655      | C. s. var. sativus (CSS)    | USA                                     | 37.56    | -80       | A                | Eurasian-26 | Qi et al. 2013             |                               |                            |
| 85 | CGN19844      | C. s. var. sativus (CSS)    | USA                                     | 35.68    | -100      | A                | Eurasian-27 | Qi et al. 2013             |                               |                            |
| 86 | PI 234517     | C. s. var. sativus (CSS)    | USA                                     | 34       | -81       | A                | Eurasian-28 | This study; Qi et al. 2013 | 41.0                          | 16.8                       |
| 87 | CGN21626      | C. s. var. sativus (CSS)    | USA                                     | 36.26    | -102      | A                | Eurasian-29 | Qi et al. 2013             |                               |                            |
| 88 | CGN21627      | C. s. var. sativus (CSS)    | USA                                     | 35.2     | -110      | A                | Eurasian-30 | Qi et al. 2013             |                               |                            |
| 89 | Marketmore 76 | C. s. var. sativus (CSS)    | USA                                     | 46.98    | -88.66    | A                | Eurasian-31 | This study                 | 40.6                          | 17.7                       |
| 90 | PI 221440     | C. s. var. sativus (CSS)    | Afghanistan, Paktia                     | 33.42    | 69.22     | A                | Eurasian-32 | Qi et al. 2013             |                               |                            |
| 91 | CG7086        | C. s. var. sativus (CSS)    | Iraq                                    | 32.46    | 51.4      | A                | Eurasian-33 | Qi et al. 2013             |                               |                            |
| 92 | PI 181752     | C. s. var. sativus (CSS)    | Syria                                   | 34.48    | 38.59     | A                | Eurasian-34 | Qi et al. 2013             |                               |                            |

|     |              |                          |                             |        |        |   |             |                            |      |      |
|-----|--------------|--------------------------|-----------------------------|--------|--------|---|-------------|----------------------------|------|------|
| 93  | CGN21691     | C. s. var. sativus (CSS) | Dem. Rep. of the Congo      | -2.88  | 23.66  | A | Eurasian-35 | Qi et al. 2013             |      |      |
| 94  | W17204       | C. s. var. sativus (CSS) | Europe                      | 42     | -110   | A | Eurasian-36 | This study                 |      |      |
| 95  | TMG-1        | C. s. var. sativus (CSS) | China, Taiwan               | 45     | -120   | A | Eurasian-37 | This study                 | 66.2 | 24.8 |
| 96  | Straight 8   | C. s. var. sativus (CSS) | USA                         | 35.7   | -102   | A | Eurasian-38 | This study                 | 58.0 | 16.4 |
| 97  | W17037A (P1) | C. s. var. sativus (CSS) | USA                         | 42.54  | -84.82 | A | Eurasian-39 | This study                 | 34.8 | 17.3 |
| 98  | W17354 (NP1) | C. s. var. sativus (CSS) | USA                         | 42.54  | -84.82 | A | Eurasian-40 | This study; Qi et al. 2013 | 45.6 | 23.2 |
| 99  | H19          | C. s. var. sativus (CSS) | USA                         | 43.07  | -89.4  | A | Eurasian-41 | This study                 | 27.2 | 10.8 |
| 100 | G421         | C. s. var. sativus (CSS) | USA                         | 45.202 | -88.2  | A | Eurasian-42 | This study                 |      |      |
| 101 | W17088D      | C. s. var. sativus (CSS) | Pakistan                    | 45     | -120   | A | Eurasian-43 | This study                 |      |      |
| 102 | W12757       | C. s. var. sativus (CSS) | USA                         | 43.10  | -89.40 | A | Eurasian-44 | This study                 | 20.4 | 13.0 |
| 103 | Gy14         | C. s. var. sativus (CSS) | USA                         | 36.8   | -100.6 | A | Eurasian-45 | This study                 |      |      |
| 104 | CG5801       | C. s. var. sativus (CSS) | China, Tianjin              | 39.13  | 117.18 | A | Eurasian-46 | Qi et al. 2013             |      |      |
| 105 | CG1292       | C. s. var. sativus (CSS) | China, Hebei                | 38.04  | 114.5  | A | Eurasian-47 | Qi et al. 2013             |      |      |
| 106 | CG1031       | C. s. var. sativus (CSS) | China, Beijing              | 39.92  | 116.39 | A | Eurasian-48 | Qi et al. 2013             |      |      |
| 107 | CG1043       | C. s. var. sativus (CSS) | China, Jilin                | 43.87  | 126.55 | A | Eurasian-49 | Qi et al. 2013             |      |      |
| 108 | CG1071       | C. s. var. sativus (CSS) | China, Jilin                | 43.9   | 125.2  | A | Eurasian-50 | This study; Qi et al. 2013 | 36.6 | 15.2 |
| 109 | CG1077       | C. s. var. sativus (CSS) | China, Jilin                | 43.88  | 126.4  | A | Eurasian-51 | Qi et al. 2013             |      |      |
| 110 | CG1083       | C. s. var. sativus (CSS) | China, Jilin                | 43.89  | 126.3  | A | Eurasian-52 | Qi et al. 2013             |      |      |
| 111 | CG1149       | C. s. var. sativus (CSS) | China, Neimengu             | 44     | 113    | A | Eurasian-53 | Qi et al. 2013             |      |      |
| 112 | CG1247       | C. s. var. sativus (CSS) | China, Shanxi               | 37.87  | 112.56 | A | Eurasian-54 | Qi et al. 2013             |      |      |
| 113 | CG1322       | C. s. var. sativus (CSS) | China, Hebei                | 38.87  | 115.47 | A | Eurasian-55 | Qi et al. 2013             |      |      |
| 114 | CG1373       | C. s. var. sativus (CSS) | China, Hebei                | 37.73  | 115.7  | A | Eurasian-56 | Qi et al. 2013             |      |      |
| 115 | CG1541       | C. s. var. sativus (CSS) | China, Liaoning             | 41.81  | 123.43 | A | Eurasian-57 | Qi et al. 2013             |      |      |
| 116 | CG1697       | C. s. var. sativus (CSS) | China, Shandong             | 36.67  | 116.98 | A | Eurasian-58 | Qi et al. 2013             |      |      |
| 117 | CG1778       | C. s. var. sativus (CSS) | ?                           | 36.8   | 118    | A | Eurasian-59 | Qi et al. 2013             |      |      |
| 118 | CG1811       | C. s. var. sativus (CSS) | China, Shandong             | 36.2   | 117.08 | A | Eurasian-60 | Qi et al. 2013             |      |      |
| 119 | CG1876       | C. s. var. sativus (CSS) | China                       | 35     | 103    | A | Eurasian-61 | Qi et al. 2013             |      |      |
| 120 | CG3007       | C. s. var. sativus (CSS) | Japan                       | 35.68  | 139.77 | A | Eurasian-62 | Qi et al. 2013             |      |      |
| 121 | CG3010       | C. s. var. sativus (CSS) | Japan                       | 35.66  | 139.79 | A | Eurasian-63 | Qi et al. 2013             |      |      |
| 122 | CGN20854     | C. s. var. sativus (CSS) | Japan                       | 35.58  | 139.72 | A | Eurasian-64 | Qi et al. 2013             |      |      |
| 123 | PI 504563    | C. s. var. sativus (CSS) | Japan, Tsuda                | 36.24  | 140.29 | A | Eurasian-65 | Qi et al. 2013             |      |      |
| 124 | PI 532523    | C. s. var. sativus (CSS) | Japan                       | 38.5   | 139.5  | A | Eurasian-66 | Qi et al. 2013             |      |      |
| 125 | PI 227210    | C. s. var. sativus (CSS) | Japan, Honshu               | 36     | 138    | A | Eurasian-67 | Qi et al. 2013             |      |      |
| 126 | PI 267942    | C. s. var. sativus (CSS) | Japan                       | 33.22  | 129.53 | A | Eurasian-68 | Qi et al. 2013             |      |      |
| 127 | CG3127       | C. s. var. sativus (CSS) | Japan                       | 34.79  | 136.4  | A | Eurasian-69 | Qi et al. 2013             |      |      |
| 128 | CG4041       | C. s. var. sativus (CSS) | China, Sichuan              | 30.13  | 102.93 | A | Eurasian-70 | Qi et al. 2013             |      |      |
| 129 | CG4081       | C. s. var. sativus (CSS) | China, Guangdong            | 23.06  | 113.16 | A | Eurasian-71 | Qi et al. 2013             |      |      |
| 130 | CG4182       | C. s. var. sativus (CSS) | China, Hunan                | 27.4   | 111.8  | A | Eurasian-72 | Qi et al. 2013             |      |      |
| 131 | CG4210       | C. s. var. sativus (CSS) | China, Chongqing            | 29.56  | 106.57 | A | Eurasian-73 | Qi et al. 2013             |      |      |
| 132 | CC3          | C. s. var. sativus (CSS) | China                       | 39.92  | 116.39 | A | Eurasian-74 | This study                 | 61.0 | 21.0 |
| 133 | W17239       | C. s. var. sativus (CSS) | China                       | 34.16  | 108.04 | A | Eurasian-75 | This study                 |      |      |
| 134 | W17238       | C. s. var. sativus (CSS) | China                       | 34.3   | 108.5  | A | Eurasian-76 | This study                 |      |      |
| 135 | W17237       | C. s. var. sativus (CSS) | China                       | 32.23  | 119.24 | A | Eurasian-77 | This study                 |      |      |
| 136 | W17123       | C. s. var. sativus (CSS) | China                       | 43.9   | 125.2  | A | Eurasian-78 | This study                 | 40.6 | 19.5 |
| 137 | PI 220791    | C. s. var. sativus (CSS) | Afghanistan, Kabul          | 34.53  | 69.17  | A |             | This study                 | 69.4 | 25.4 |
| 138 | PI 220171    | C. s. var. sativus (CSS) | Afghanistan, Kandahar       | 31.62  | 65.72  | A |             | This study                 |      |      |
| 139 | PI 212599    | C. s. var. sativus (CSS) | Afghanistan, Nangarhar      | 34.25  | 70.5   | A |             | This study                 |      |      |
| 140 | PI 246930    | C. s. var. sativus (CSS) | Afghanistan, Nangarhar      | 34.1   | 70.37  | A |             | This study                 |      |      |
| 141 | PI 289698    | C. s. var. sativus (CSS) | Australia                   | -35.31 | 149.12 | A |             | This study                 |      |      |
| 142 | PI 267745    | C. s. var. sativus (CSS) | Brazil, Sao Paulo           | -23.55 | -46.63 | A |             | This study                 | 36.5 | 20.6 |
| 143 | PI 229808    | C. s. var. sativus (CSS) | Canada, Ontario             | 50     | -85    | A |             | This study                 | 42.6 | 23.2 |
| 144 | PI 306785    | C. s. var. sativus (CSS) | Canada, Ontario             | 50     | -85    | A |             | This study                 | 37.0 | 20.5 |
| 145 | PI 451975    | C. s. var. sativus (CSS) | Canada, Ontario             | 51.15  | -85.19 | A |             | This study                 |      |      |
| 146 | 9930         | C. s. var. sativus (CSS) | China                       | 39.9   | 116.42 | A |             | This study                 | 45.6 | 23.2 |
| 147 | AM022        | C. s. var. sativus (CSS) | China                       | 39.92  | 116.56 | A |             | This study                 | 42.0 | 19.4 |
| 148 | AM307        | C. s. var. sativus (CSS) | China                       | -27.26 | 153.02 | A |             | This study                 |      |      |
| 149 | Beit Alpha   | C. s. var. sativus (CSS) | China                       | 51.58  | 5.16   | A |             | This study                 | 32.2 | 15.6 |
| 150 | PI 418989    | C. s. var. sativus (CSS) | China                       | 42.5   | 110.5  | A |             | This study                 |      |      |
| 151 | PI 419017    | C. s. var. sativus (CSS) | China                       | 37.59  | 114.31 | A |             | This study                 |      |      |
| 152 | PI 432850    | C. s. var. sativus (CSS) | China                       | 38.04  | 114.48 | A |             | This study                 | 78.0 | 27.4 |
| 153 | PI 432855    | C. s. var. sativus (CSS) | China                       | 38.89  | 115.47 | A |             | This study                 |      |      |
| 154 | PI 432858    | C. s. var. sativus (CSS) | China                       | 40.08  | 113.43 | A |             | This study                 |      |      |
| 155 | PI 432867    | C. s. var. sativus (CSS) | China                       | 41.8   | 123.4  | A |             | This study                 | 55.0 | 20.2 |
| 156 | PI 432896    | C. s. var. sativus (CSS) | China                       | 35.51  | 104.11 | A |             | This study                 |      |      |
| 157 | PI 618915    | C. s. var. sativus (CSS) | China                       | 34.32  | 109.19 | A |             | This study                 | 31.2 | 19.0 |
| 158 | W17325       | C. s. var. sativus (CSS) | China                       | 45.47  | 127.02 | A |             | This study                 | 36.6 | 14.8 |
| 159 | W17432       | C. s. var. sativus (CSS) | China                       | 39.54  | 116.24 | A |             | This study                 |      |      |
| 160 | W17434       | C. s. var. sativus (CSS) | China                       | 39.8   | 116.8  | A |             | This study                 |      |      |
| 161 | W17437       | C. s. var. sativus (CSS) | China                       | 39.04  | 117.11 | A |             | This study                 |      |      |
| 162 | W17440       | C. s. var. sativus (CSS) | China                       | 27.45  | 68.1   | A |             | This study                 |      |      |
| 163 | PI 105340    | C. s. var. sativus (CSS) | China, Beijing              | 39.92  | 116.41 | A |             | This study                 | 80.6 | 21.6 |
| 164 | PI 618917    | C. s. var. sativus (CSS) | China, Beijing              | 39.91  | 116.38 | A |             | This study                 | 21.6 | 11.8 |
| 165 | PI 478367    | C. s. var. sativus (CSS) | China, Gansu                | 38     | 102    | A |             | This study                 | 38.2 | 22.0 |
| 166 | PI 257486    | C. s. var. sativus (CSS) | China, Heilongjiang         | 47.28  | 125.26 | A |             | This study                 | 30.4 | 19.8 |
| 167 | PI 257487    | C. s. var. sativus (CSS) | China, Heilongjiang         | 48     | 129    | A |             | This study                 | 32.8 | 16.0 |
| 168 | PI 267742    | C. s. var. sativus (CSS) | China, Hong Kong            | 22.27  | 114.19 | A |             | This study                 | 62.4 | 15.2 |
| 169 | PI 267743    | C. s. var. sativus (CSS) | China, Hong Kong            | 22.26  | 114.18 | A |             | This study                 | 67.2 | 17.6 |
| 170 | PI 618944    | C. s. var. sativus (CSS) | China, Jiangsu              | 32.4   | 119.42 | A |             | This study                 | 51.4 | 23.4 |
| 171 | PI 419009    | C. s. var. sativus (CSS) | China, Lin-yang             | 38     | 105    | A |             | This study                 |      |      |
| 172 | PI 432882    | C. s. var. sativus (CSS) | China, San dong si gua      | 36.66  | 116.98 | A |             | This study                 | 35.8 | 16.0 |
| 173 | PI 432875    | C. s. var. sativus (CSS) | China, San dong si gua 101  | 41.3   | 123.77 | A |             | This study                 | 30.0 | 15.2 |
| 174 | PI 432877    | C. s. var. sativus (CSS) | China, San dong si gua 507  | 37.73  | 115.7  | A |             | This study                 | 31.0 | 14.2 |
| 175 | PI 432874    | C. s. var. sativus (CSS) | China, San dong si gua 52   | 36.6   | 114.48 | A |             | This study                 |      |      |
| 176 | PI 432886    | C. s. var. sativus (CSS) | China, San dong si gua 7156 | 40.22  | 116.21 | A |             | This study                 | 38.0 | 20.0 |
| 177 | PI 418962    | C. s. var. sativus (CSS) | China, Shaanxi              | 34.16  | 108.56 | A |             | This study                 |      |      |
| 178 | PI 418963    | C. s. var. sativus (CSS) | China, Shaanxi              | 35.6   | 108.4  | A |             | This study                 | 27.6 | 16.4 |
| 179 | PI 418964    | C. s. var. sativus (CSS) | China, Shaanxi              | 35.9   | 107.9  | A |             | This study                 |      |      |
| 180 | PI 192940    | C. s. var. sativus (CSS) | China, Shanghai             | 31.13  | 121.27 | A |             | This study                 |      |      |
| 181 | PI 432869    | C. s. var. sativus (CSS) | China, Shanghai             | 31.22  | 121.55 | A |             | This study                 | 27.8 | 15.0 |
| 182 | PI 432892    | C. s. var. sativus (CSS) | China, Si Gua Qing 5896     | 39.33  | 115.87 | A |             | This study                 | 54.0 | 22.8 |
| 183 | PI 321006    | C. s. var. sativus (CSS) | China, Taiwan               | 23.5   | 121    | A |             | This study                 | 54.0 | 23.3 |
| 184 | PI 321007    | C. s. var. sativus (CSS) | China, Taiwan               | 23.48  | 120.89 | A |             | This study                 | 27.0 | 15.8 |
| 185 | PI 321009    | C. s. var. sativus (CSS) | China, Taiwan               | 23.52  | 121.23 | A |             | This study                 | 43.4 | 15.5 |

|     |                |                          |                                |       |        |   |                |      |      |
|-----|----------------|--------------------------|--------------------------------|-------|--------|---|----------------|------|------|
| 186 | PI 321010      | C. s. var. sativus (CSS) | China, Taiwan                  | 23.41 | 120.57 | A | This study     |      |      |
| 187 | PI 618937      | C. s. var. sativus (CSS) | China, Tianjin                 | 39.13 | 117.18 | A | This study     | 33.8 | 18.8 |
| 188 | PI 489754      | C. s. var. sativus (CSS) | China, Wen shang               | 35.73 | 116.48 | A | This study     | 23.2 | 16.4 |
| 189 | PI 432870      | C. s. var. sativus (CSS) | China, Ye er sau               | 36.08 | 111.52 | A | This study     | 26.2 | 14.0 |
| 190 | PI 283899      | C. s. var. sativus (CSS) | Czech Republic                 | 49.75 | 15.75  | A | This study     | 28.8 | 15.0 |
| 191 | PI 283902      | C. s. var. sativus (CSS) | Czech Republic                 | 49.49 | 15.28  | A | This study     |      |      |
| 192 | PI 422184      | C. s. var. sativus (CSS) | Czech Republic                 | 49.3  | 15.4   | A | This study     | 65.0 | 19.7 |
| 193 | PI 342950      | C. s. var. sativus (CSS) | Denmark                        | 55.72 | 12.57  | A | This study     | 65.5 | 21.4 |
| 194 | PI 342951      | C. s. var. sativus (CSS) | Denmark                        | 56.15 | 9.3    | A | This study     |      |      |
| 195 | PI 354952      | C. s. var. sativus (CSS) | Denmark                        | 55.7  | 13     | A | This study     | 32.8 | 18.0 |
| 196 | PI 183224      | C. s. var. sativus (CSS) | Egypt                          | 26    | 30     | A | This study     | 45.0 | 20.0 |
| 197 | PI 188749      | C. s. var. sativus (CSS) | Egypt, Cairo                   | 30.02 | 31.14  | A | This study     |      |      |
| 198 | PI 296120      | C. s. var. sativus (CSS) | Egypt, Cairo                   | 30.05 | 31.23  | A | This study     | 69.2 | 24.4 |
| 199 | NZ1            | C. s. var. sativus (CSS) | Europe                         | 39.86 | 116.32 | A | This study     |      |      |
| 200 | NZ1101         | C. s. var. sativus (CSS) | Europe                         | 51.75 | 5.6    | A | This study     | 54.4 | 16.4 |
| 201 | W17003         | C. s. var. sativus (CSS) | Europe                         | 32    | 34.8   | A | This study     | 36.0 | 22.2 |
| 202 | W17004         | C. s. var. sativus (CSS) | Europe                         | 31.8  | 35.23  | A | This study     | 50.0 | 21.8 |
| 203 | W17138         | C. s. var. sativus (CSS) | Europe                         | 41.97 | 13.14  | A | This study     | 52.8 | 21.8 |
| 204 | PI 351140      | C. s. var. sativus (CSS) | Former Soviet Union            | 55.75 | 37.62  | A | This study     |      |      |
| 205 | PI 435946      | C. s. var. sativus (CSS) | Former Soviet Union            | 54.47 | 85.2   | A | This study     |      |      |
| 206 | PI 435947      | C. s. var. sativus (CSS) | Former Soviet Union            | 55.75 | 37.62  | A | This study     | 48.6 | 16.4 |
| 207 | PI 314425      | C. s. var. sativus (CSS) | Georgia                        | 32.96 | -83.11 | A | This study     | 46.2 | 20.2 |
| 208 | PI 264666      | C. s. var. sativus (CSS) | Germany                        | 51.2  | 10.27  | A | This study     |      |      |
| 209 | PI 264667      | C. s. var. sativus (CSS) | Germany                        | 53.2  | 11.5   | A | This study     |      |      |
| 210 | PI 288996      | C. s. var. sativus (CSS) | Hungary                        | 47.43 | 19.25  | A | This study     | 72.5 | 17.0 |
| 211 | PI 531313      | C. s. var. sativus (CSS) | Hungary                        | 47.43 | 19.25  | A | This study     | 31.6 | 22.6 |
| 212 | CU124          | C. s. var. sativus (CSS) | India                          | 27.16 | 81.48  | A | This study     |      |      |
| 213 | PI 271331      | C. s. var. sativus (CSS) | India                          | 18.9  | 72.72  | A | This study     | 45.0 | 21.6 |
| 214 | PI 197085      | C. s. var. sativus (CSS) | India, Assam                   | 26.14 | 91.77  | A | This study     | 41.8 | 14.4 |
| 215 | PI 197087      | C. s. var. sativus (CSS) | India, Assam                   | 26.15 | 91.78  | A | This study     |      |      |
| 216 | Swarna Sheetal | C. s. var. sativus (CSS) | India, HARP, Ranchi Jharkhand  | 23.6  | 85.9   | A | This study, PS |      |      |
| 217 | PI 214049      | C. s. var. sativus (CSS) | India, Karnataka               | 15.19 | 75.42  | A | This study     |      |      |
| 218 | PI 605998      | C. s. var. sativus (CSS) | India, Madhya Pradesh          | 22.58 | 78.39  | A | This study     |      |      |
| 219 | PI 271327      | C. s. var. sativus (CSS) | India, Maharashtra             | 18.95 | 72.81  | A | This study     | 45.0 | 18.0 |
| 220 | PCUC-09        | C. s. var. sativus (CSS) | India, Pantnagar Udham Singhna | 29.01 | 79.29  | A | This study, PS |      |      |
| 221 | PCUC-27        | C. s. var. sativus (CSS) | India, Pantnagar Udham Singhna | 29.05 | 79.65  | A | This study, PS |      |      |
| 222 | PI 605930      | C. s. var. sativus (CSS) | India, Rajasthan               | 26.6  | 73.9   | A | This study     | 24.6 | 17.2 |
| 223 | PI 605933      | C. s. var. sativus (CSS) | India, Rajasthan               | 26.5  | 73.8   | A | This study     | 28.8 | 16.4 |
| 224 | PI 605948      | C. s. var. sativus (CSS) | India, Rajasthan               | 27.2  | 74.3   | A | This study     |      |      |
| 225 | PI 605979      | C. s. var. sativus (CSS) | India, Rajasthan               | 26.8  | 73.9   | A | This study     |      |      |
| 226 | PI 605981      | C. s. var. sativus (CSS) | India, Rajasthan               | 26.4  | 74.6   | A | This study     |      |      |
| 227 | PI 173889      | C. s. var. sativus (CSS) | India, Uttar Pradesh           | 26.85 | 80.91  | A | This study     | 38.0 | 22.2 |
| 228 | PI 137844      | C. s. var. sativus (CSS) | Iran                           | 38.25 | 48.29  | A | This study     | 68.6 | 20.2 |
| 229 | PI 211983      | C. s. var. sativus (CSS) | Iran, East Azerbaijan          | 37.54 | 46.16  | A | This study     |      |      |
| 230 | PI 211984      | C. s. var. sativus (CSS) | Iran, East Azerbaijan          | 37.54 | 46.16  | A | This study     |      |      |
| 231 | PI 222985      | C. s. var. sativus (CSS) | Iran, East Azerbaijan          | 40.3  | 47.3   | A | This study     |      |      |
| 232 | PI 137851      | C. s. var. sativus (CSS) | Iran, Esfahan                  | 33.49 | 48.36  | A | This study     | 43.6 | 30.0 |
| 233 | PI 344435      | C. s. var. sativus (CSS) | Iran, Fars                     | 29.06 | 53.02  | A | This study     |      |      |
| 234 | PI 344434      | C. s. var. sativus (CSS) | Iran, Mazandaran               | 36.13 | 52.31  | A | This study     |      |      |
| 235 | PI 344442      | C. s. var. sativus (CSS) | Iran, Tehran                   | 35.7  | 51.42  | A | This study     | 84.6 | 22.0 |
| 236 | PI 344445      | C. s. var. sativus (CSS) | Iran, Tehran                   | 35.6  | 51.3   | A | This study     | 66.4 | 12.0 |
| 237 | PI 344438      | C. s. var. sativus (CSS) | Iran, West Azerbaijan          | 37.55 | 45.07  | A | This study     | 77.8 | 23.2 |
| 238 | PI 137847      | C. s. var. sativus (CSS) | Iran, Yazd                     | 31.89 | 54.36  | A | This study     | 83.0 | 30.5 |
| 239 | PI 292012      | C. s. var. sativus (CSS) | Israel                         | 31    | 35     | A | This study     | 54.5 | 18.8 |
| 240 | PI 293923      | C. s. var. sativus (CSS) | Israel                         | 31.2  | 35.3   | A | This study     | 36.3 | 18.2 |
| 241 | PI 279464      | C. s. var. sativus (CSS) | Japan                          | 35.8  | 137.8  | A | This study     | 64.8 | 13.8 |
| 242 | PI 279465      | C. s. var. sativus (CSS) | Japan                          | 35.7  | 137.7  | A | This study     | 53.0 | 13.6 |
| 243 | PI 279466      | C. s. var. sativus (CSS) | Japan                          | 35.9  | 138    | A | This study     | 38.4 | 15.0 |
| 244 | PI 279469      | C. s. var. sativus (CSS) | Japan                          | 34.51 | 128.27 | A | This study     | 27.2 | 19.6 |
| 245 | PI 390240      | C. s. var. sativus (CSS) | Japan                          | 36.5  | 138.6  | A | This study     | 43.2 | 12.8 |
| 246 | PI 390243      | C. s. var. sativus (CSS) | Japan                          | 36.18 | 139.22 | A | This study     | 41.4 | 16.8 |
| 247 | PI 390244      | C. s. var. sativus (CSS) | Japan                          | 32.42 | 131.62 | A | This study     | 33.6 | 11.3 |
| 248 | PI 390245      | C. s. var. sativus (CSS) | Japan                          | 32.42 | 131.62 | A | This study     | 47.7 | 35.3 |
| 249 | PI 390247      | C. s. var. sativus (CSS) | Japan                          | 32.5  | 131.7  | A | This study     |      |      |
| 250 | PI 390252      | C. s. var. sativus (CSS) | Japan                          | 36.12 | 138.15 | A | This study     |      |      |
| 251 | PI 390255      | C. s. var. sativus (CSS) | Japan                          | 36.52 | 137.9  | A | This study     | 41.0 | 16.0 |
| 252 | PI 390257      | C. s. var. sativus (CSS) | Japan                          | 36.5  | 138.2  | A | This study     |      |      |
| 253 | PI 390258      | C. s. var. sativus (CSS) | Japan                          | 36.48 | 137.7  | A | This study     | 40.0 | 17.2 |
| 254 | PI 390267      | C. s. var. sativus (CSS) | Japan                          | 35.87 | 139.65 | A | This study     | 53.6 | 20.6 |
| 255 | PI 432864      | C. s. var. sativus (CSS) | Japan                          | 34.69 | 135.5  | A | This study     | 40.8 | 21.8 |
| 256 | PI 432865      | C. s. var. sativus (CSS) | Japan                          | 35.6  | 139.6  | A | This study     | 48.4 | 20.2 |
| 257 | PI 532522      | C. s. var. sativus (CSS) | Japan                          | 36.12 | 138.15 | A | This study     |      |      |
| 258 | Yomaki         | C. s. var. sativus (CSS) | Japan                          | 36.3  | 137.9  | A | This study     |      |      |
| 259 | PI 212233      | C. s. var. sativus (CSS) | Japan, Fukuoka                 | 33.58 | 130.4  | A | This study     | 63.6 | 20.4 |
| 260 | PI 390264      | C. s. var. sativus (CSS) | Japan, Kairyo-Shindome         | 35.39 | 139.45 | A | This study     | 26.0 | 18.2 |
| 261 | PI 390253      | C. s. var. sativus (CSS) | Japan, Mogami - Japan          | 43.18 | 140.98 | A | This study     | 45.0 | 18.4 |
| 262 | PI 385967      | C. s. var. sativus (CSS) | Kenya                          | -1.27 | 36.8   | A | This study     | 47.6 | 20.4 |
| 263 | PI 181755      | C. s. var. sativus (CSS) | Lebanon                        | 33.9  | 35.53  | A | This study     | 71.3 | 22.2 |
| 264 | PI 357830      | C. s. var. sativus (CSS) | Macedonia                      | 41.36 | 21.44  | A | This study     |      |      |
| 265 | PI 357838      | C. s. var. sativus (CSS) | Macedonia                      | 41.36 | 21.44  | A | This study     |      |      |
| 266 | PI 357863      | C. s. var. sativus (CSS) | Macedonia                      | 44.83 | 20.5   | A | This study     | 46.0 | 23.0 |
| 267 | PI 357864      | C. s. var. sativus (CSS) | Macedonia                      | 41.36 | 21.44  | A | This study     |      |      |
| 268 | PI 357867      | C. s. var. sativus (CSS) | Macedonia                      | 44.6  | 20.76  | A | This study     | 68.0 | 22.5 |
| 269 | PI 368552      | C. s. var. sativus (CSS) | Macedonia                      | 41.25 | 21     | A | This study     |      |      |
| 270 | PI 368553      | C. s. var. sativus (CSS) | Macedonia                      | 41.36 | 21.44  | A | This study     |      |      |
| 271 | PI 368558      | C. s. var. sativus (CSS) | Macedonia                      | 44.5  | 20.6   | A | This study     |      |      |
| 272 | PI 379282      | C. s. var. sativus (CSS) | Macedonia                      | 44.78 | 20.45  | A | This study     | 60.8 | 28.4 |
| 273 | PI 379285      | C. s. var. sativus (CSS) | Macedonia                      | 41.6  | 21.7   | A | This study     | 24.5 | 15.0 |
| 274 | PI 358813      | C. s. var. sativus (CSS) | Malaysia, Kuala Lumpur         | 3.14  | 101.69 | A | This study     | 59.2 | 14.2 |
| 275 | PI 525075      | C. s. var. sativus (CSS) | Mauritius                      | -20.2 | 57.5   | A | This study     | 36.4 | 14.4 |
| 276 | PI 263080      | C. s. var. sativus (CSS) | Moldova                        | 47    | 28.92  | A | This study     | 45.0 | 17.6 |
| 277 | PI 200818      | C. s. var. sativus (CSS) | Myanmar, Mandalay              | 21.94 | 96.05  | A | This study     |      |      |
| 278 | 1334A3N        | C. s. var. sativus (CSS) | Netherlands                    | 30.42 | 35.45  | A | This study     | 35.0 | 17.4 |

|     |                      |                          |                               |        |         |   |            |       |      |
|-----|----------------------|--------------------------|-------------------------------|--------|---------|---|------------|-------|------|
| 279 | PI 255933            | C. s. var. sativus (CSS) | Netherlands                   | 52.32  | 5.55    | A | This study | 48.4  | 20.0 |
| 280 | PI 277741            | C. s. var. sativus (CSS) | Netherlands                   | 52.22  | 4.52    | A | This study | 50.6  | 20.3 |
| 281 | PI 356832            | C. s. var. sativus (CSS) | Netherlands                   | 52.3   | 5.5     | A | This study | 49.0  | 16.2 |
| 282 | PI 360939            | C. s. var. sativus (CSS) | Netherlands                   | 52.07  | 5.17    | A | This study |       |      |
| 283 | PI 372905            | C. s. var. sativus (CSS) | Netherlands                   | 52.2   | 5.6     | A | This study | 34.5  | 15.5 |
| 284 | PI 406473            | C. s. var. sativus (CSS) | Netherlands                   | 52.6   | 5.7     | A | This study | 30.4  | 12.2 |
| 285 | PI 422180            | C. s. var. sativus (CSS) | Netherlands                   | 51.8   | 5.45    | A | This study | 34.0  | 16.2 |
| 286 | PI 422182            | C. s. var. sativus (CSS) | Netherlands                   | 53     | 5.9     | A | This study | 44.6  | 18.0 |
| 287 | PI 275410            | C. s. var. sativus (CSS) | Netherlands, Gelderland       | 51.57  | 5.52    | A | This study | 31.8  | 22.8 |
| 288 | PI 275411            | C. s. var. sativus (CSS) | Netherlands, Gelderland       | 52.02  | 5.52    | A | This study |       |      |
| 289 | PI 135122            | C. s. var. sativus (CSS) | NewZealand, Auckland Islands  | -50.7  | 166.1   | A | This study | 39.0  | 13.2 |
| 290 | PI 163223            | C. s. var. sativus (CSS) | Pakistan, Punjab              | 33.1   | 73.26   | A | This study | 30.8  | 14.5 |
| 291 | PI 426169            | C. s. var. sativus (CSS) | Philippines, Luzon            | 16     | 121     | A | This study | 55.8  | 13.0 |
| 292 | PI 426170            | C. s. var. sativus (CSS) | Philippines, Luzon            | 16.5   | 121.5   | A | This study | 50.4  | 21.8 |
| 293 | PI 285603            | C. s. var. sativus (CSS) | Poland, Warszawa              | 52.13  | 21.1    | A | This study |       |      |
| 294 | PI 285605            | C. s. var. sativus (CSS) | Poland, Warszawa              | 52.23  | 21.02   | A | This study | 33.5  | 17.2 |
| 295 | PI 285606            | C. s. var. sativus (CSS) | Poland, Warszawa              | 52.28  | 21.14   | A | This study | 33.8  | 14.7 |
| 296 | PI 285608            | C. s. var. sativus (CSS) | Poland, Warszawa              | 53.31  | 22      | A | This study | 35.3  | 15.5 |
| 297 | PI 285610            | C. s. var. sativus (CSS) | Poland, Warszawa              | 52.11  | 20.88   | A | This study | 50.6  | 17.6 |
| 298 | PI 369717            | C. s. var. sativus (CSS) | Poland, Warszawa              | 52.23  | 21.02   | A | This study | 41.2  | 20.4 |
| 299 | PI 401732            | C. s. var. sativus (CSS) | Puerto Rico                   | 18.13  | -66.35  | A | This study |       |      |
| 300 | PI 401734            | C. s. var. sativus (CSS) | Puerto Rico                   | 18.45  | -66.1   | A | This study | 47.4  | 19.0 |
| 301 | PI 466922            | C. s. var. sativus (CSS) | Russian Federation            | 55.2   | 35.9    | A | This study | 40.4  | 13.0 |
| 302 | PI 308915            | C. s. var. sativus (CSS) | Russian Federation, Krasnodar | 45.03  | 40.5    | A | This study |       |      |
| 303 | PI 308916            | C. s. var. sativus (CSS) | Russian Federation, Krasnodar | 45.01  | 38.58   | A | This study |       |      |
| 304 | PI 458845            | C. s. var. sativus (CSS) | Russian Federation, Moscow    | 55.45  | 37.37   | A | This study |       |      |
| 305 | PI 458855            | C. s. var. sativus (CSS) | Russian Federation, Moscow    | 54.3   | 36.4    | A | This study | 34.8  | 16.6 |
| 306 | AM389                | C. s. var. sativus (CSS) | South Korea                   | 23.08  | 113.2   | A | This study |       |      |
| 307 | PI 508453            | C. s. var. sativus (CSS) | South Korea, Incheon          | 37.48  | 126.63  | A | This study | 30.6  | 13.5 |
| 308 | PI 508456            | C. s. var. sativus (CSS) | South Korea, Incheon          | 37.4   | 126.6   | A | This study | 31.4  | 16.0 |
| 309 | PI 483340            | C. s. var. sativus (CSS) | South Korea, Seoul            | 37.56  | 126.9   | A | This study | 30.0  | 15.4 |
| 310 | PI 483344            | C. s. var. sativus (CSS) | South Korea, Seoul            | 37.57  | 126.98  | A | This study | 31.8  | 12.0 |
| 311 | PI 261608            | C. s. var. sativus (CSS) | Spain, Alava                  | 42.84  | -2.76   | A | This study |       |      |
| 312 | PI 257286            | C. s. var. sativus (CSS) | Spain, Murcia                 | 37.99  | -1.13   | A | This study | 74.6  | 43.3 |
| 313 | PI 205995            | C. s. var. sativus (CSS) | Sweden                        | 59.35  | 18.07   | A | This study |       |      |
| 314 | PI 205996            | C. s. var. sativus (CSS) | Sweden                        | 59.36  | 16.32   | A | This study | 38.8  | 23.2 |
| 315 | PI 181874            | C. s. var. sativus (CSS) | Syria                         | 33.5   | 36.3    | A | This study | 65.0  | 29.2 |
| 316 | PI 109483            | C. s. var. sativus (CSS) | Turkey                        | 38.57  | 35.14   | A | This study |       |      |
| 317 | PI 109484            | C. s. var. sativus (CSS) | Turkey                        | 39.92  | 32.83   | A | This study | 72.2  | 27.4 |
| 318 | PI 175686            | C. s. var. sativus (CSS) | Turkey                        | 38.41  | 35.3    | A | This study |       |      |
| 319 | PI 176523            | C. s. var. sativus (CSS) | Turkey, Afyon                 | 38.76  | 30.54   | A | This study | 82.6  | 19.6 |
| 320 | PI 169397            | C. s. var. sativus (CSS) | Turkey, Bursa                 | 40.18  | 29.05   | A | This study | 102.6 | 30.0 |
| 321 | PI 169391            | C. s. var. sativus (CSS) | Turkey, Canakkale             | 40.16  | 26.41   | A | This study | 79.0  | 24.0 |
| 322 | PI 169393            | C. s. var. sativus (CSS) | Turkey, Canakkale             | 40.15  | 26.4    | A | This study | 82.6  | 28.0 |
| 323 | PI 178888            | C. s. var. sativus (CSS) | Turkey, Cankiri               | 40.6   | 33.62   | A | This study | 39.3  | 16.5 |
| 324 | PI 177361            | C. s. var. sativus (CSS) | Turkey, Corum                 | 40.33  | 34.57   | A | This study | 53.0  | 28.5 |
| 325 | PI 169389            | C. s. var. sativus (CSS) | Turkey, Edirne                | 41.4   | 26.33   | A | This study |       |      |
| 326 | PI 175697            | C. s. var. sativus (CSS) | Turkey, Eskisehir             | 39.46  | 30.31   | A | This study |       |      |
| 327 | PI 171613            | C. s. var. sativus (CSS) | Turkey, Gumushane             | 40.39  | 39.42   | A | This study | 90.0  | 29.0 |
| 328 | PI 167223            | C. s. var. sativus (CSS) | Turkey, Icel                  | 36.63  | 33.62   | A | This study | 88.8  | 19.6 |
| 329 | PI 175693            | C. s. var. sativus (CSS) | Turkey, Kayseri               | 38.43  | 35.28   | A | This study |       |      |
| 330 | PI 176519            | C. s. var. sativus (CSS) | Turkey, Kayseri               | 38.73  | 35.48   | A | This study | 114.2 | 17.8 |
| 331 | PI 176953            | C. s. var. sativus (CSS) | Turkey, Kayseri               | 38.43  | 35.28   | A | This study |       |      |
| 332 | PI 176954            | C. s. var. sativus (CSS) | Turkey, Kayseri               | 38.73  | 35.48   | A | This study | 61.3  | 24.3 |
| 333 | PI 204568            | C. s. var. sativus (CSS) | Turkey, Kayseri               | 38.73  | 35.48   | A | This study |       |      |
| 334 | PI 175688            | C. s. var. sativus (CSS) | Turkey, Kocaeli               | 40.77  | 29.92   | A | This study | 100.6 | 20.0 |
| 335 | PI 174173            | C. s. var. sativus (CSS) | Turkey, Maras                 | 36.49  | 28.38   | A | This study |       |      |
| 336 | PI 175689            | C. s. var. sativus (CSS) | Turkey, Nigde                 | 37.97  | 34.68   | A | This study |       |      |
| 337 | PI 175679            | C. s. var. sativus (CSS) | Turkey, Sinop                 | 42.01  | 35.09   | A | This study |       |      |
| 338 | PI 171608            | C. s. var. sativus (CSS) | Turkey, Tokat                 | 40.31  | 36.55   | A | This study | 77.2  | 19.0 |
| 339 | PI 206425            | C. s. var. sativus (CSS) | Turkey, Trabzon               | 41.09  | 39.43   | A | This study |       |      |
| 340 | PI 174166            | C. s. var. sativus (CSS) | Turkey, Urfa                  | 37.16  | 38.79   | A | This study | 69.6  | 25.4 |
| 341 | PI 174167            | C. s. var. sativus (CSS) | Turkey, Urfa                  | 37.1   | 38.47   | A | This study |       |      |
| 342 | PI 178884            | C. s. var. sativus (CSS) | Turkey, Zonguldak             | 41.27  | 31.47   | A | This study |       |      |
| 343 | PI 414159            | C. s. var. sativus (CSS) | UnitedStates, Hawaii          | 21.31  | -157.79 | A | This study | 34.0  | 18.6 |
| 344 | PI 209069            | C. s. var. sativus (CSS) | UnitedStates, Ohio            | 40.5   | -82.5   | A | This study |       |      |
| 345 | Addis                | C. s. var. sativus (CSS) | USA                           | 48.13  | -95.38  | A | This study |       |      |
| 346 | AM218                | C. s. var. sativus (CSS) | USA                           | 45.54  | -90.37  | A | This study |       |      |
| 347 | AM238                | C. s. var. sativus (CSS) | USA                           | -35.28 | 149.15  | A | This study | 33.4  | 25.2 |
| 348 | AM239                | C. s. var. sativus (CSS) | USA                           | 45.61  | -94.09  | A | This study | 25.6  | 18.6 |
| 349 | AM243                | C. s. var. sativus (CSS) | USA                           | 50.26  | 10.17   | A | This study |       |      |
| 350 | AM274                | C. s. var. sativus (CSS) | USA                           | 47.43  | -98.51  | A | This study |       |      |
| 351 | AM277                | C. s. var. sativus (CSS) | USA                           | 43.10  | -83.40  | A | This study |       |      |
| 352 | AM292                | C. s. var. sativus (CSS) | USA                           | 43.46  | -89.17  | A | This study |       |      |
| 353 | AM397                | C. s. var. sativus (CSS) | USA                           | 35.14  | 136.59  | A | This study |       |      |
| 354 | Ames 26084           | C. s. var. sativus (CSS) | USA                           | 43.47  | -88.47  | A | This study |       |      |
| 355 | Ashley               | C. s. var. sativus (CSS) | USA                           | 46.38  | -94.42  | A | This study |       |      |
| 356 | Black Diamond        | C. s. var. sativus (CSS) | USA                           | 44.12  | -89.12  | A | This study | 32.2  | 24.0 |
| 357 | Boston Pickling      | C. s. var. sativus (CSS) | USA                           | 43.06  | -89.19  | A | This study | 38.8  | 20.6 |
| 358 | Bush Pickle          | C. s. var. sativus (CSS) | USA                           | 45.22  | -94.35  | A | This study |       |      |
| 359 | Chipper              | C. s. var. sativus (CSS) | USA                           | 43.02  | -87.56  | A | This study |       |      |
| 360 | Clinton              | C. s. var. sativus (CSS) | USA                           | 44.49  | -91.66  | A | This study | 39.0  | 17.0 |
| 361 | Cubit                | C. s. var. sativus (CSS) | USA                           | 47.20  | -98.37  | A | This study |       |      |
| 362 | De Bourbonne         | C. s. var. sativus (CSS) | USA                           | 45.49  | 1.21    | A | This study |       |      |
| 363 | Delicatessen         | C. s. var. sativus (CSS) | USA                           | 43.38  | -92.40  | A | This study | 35.0  | 18.3 |
| 364 | Double Yield         | C. s. var. sativus (CSS) | USA                           | 44.57  | -93.16  | A | This study | 40.0  | 23.0 |
| 365 | DP1                  | C. s. var. sativus (CSS) | USA                           | 52.33  | 5.58    | A | This study |       |      |
| 366 | Early Russian        | C. s. var. sativus (CSS) | USA                           | 54.41  | 83.16   | A | This study | 36.0  | 18.0 |
| 367 | Empereur Alexander   | C. s. var. sativus (CSS) | USA                           | 27.30  | 80.50   | A | This study | 37.2  | 22.0 |
| 368 | EOM-402-10           | C. s. var. sativus (CSS) | USA                           | 45.21  | -92.29  | A | This study |       |      |
| 369 | Giant White          | C. s. var. sativus (CSS) | USA                           | 42.07  | -97.17  | A | This study |       |      |
| 370 | Gyn1                 | C. s. var. sativus (CSS) | USA                           | 44.47  | -95.07  | A | This study |       |      |
| 371 | Hmong Red            | C. s. var. sativus (CSS) | USA                           | 44.08  | -89.50  | A | This study | 50.8  | 20.6 |
| 372 | Japanese Climbing    | C. s. var. sativus (CSS) | USA                           | 36.5   | 138.2   | A | This study |       |      |
| 373 | Jaune Dickfleischige | C. s. var. sativus (CSS) | USA                           | 50.48  | 9.44    | A | This study | 53.6  | 20.8 |

|     |                    |                          |                               |        |         |   |                |      |      |
|-----|--------------------|--------------------------|-------------------------------|--------|---------|---|----------------|------|------|
| 374 | Lafayette          | C. s. var. sativus (CSS) | USA                           | 43.01  | -88.34  | A | This study     | 25.0 | 17.3 |
| 375 | Large Dutch Yellow | C. s. var. sativus (CSS) | USA                           | 52.07  | 5.17    | A | This study     |      |      |
| 376 | Marketer           | C. s. var. sativus (CSS) | USA                           | 43.42  | -90.33  | A | This study     |      |      |
| 377 | Marketmore 97      | C. s. var. sativus (CSS) | USA                           | 42.27  | -76.28  | A | This study     |      |      |
| 378 | Mincu Extra Early  | C. s. var. sativus (CSS) | USA                           | 42.16  | -92.39  | A | This study     | 25.4 | 19.4 |
| 379 | Minnesota Dwarf    | C. s. var. sativus (CSS) | USA                           | 45.70  | -93.69  | A | This study     |      |      |
| 380 | Model              | C. s. var. sativus (CSS) | USA                           | 42.40  | -88.57  | A | This study     | 32.0 | 17.5 |
| 381 | MSU 713-5          | C. s. var. sativus (CSS) | USA                           | 43.27  | 89.15   | A | This study     |      |      |
| 382 | National Pickling  | C. s. var. sativus (CSS) | USA                           | 42.39  | -84.25  | A | This study     |      |      |
| 383 | NC4406             | C. s. var. sativus (CSS) | USA                           | 33.18  | -81.52  | A | This study     | 42.4 | 20.4 |
| 384 | NC46               | C. s. var. sativus (CSS) | USA                           | 35.01  | -78.58  | A | This study     | 39.2 | 20.6 |
| 385 | NC76               | C. s. var. sativus (CSS) | USA                           | 35.51  | -78.38  | A | This study     | 72.0 | 19.7 |
| 386 | Northern Pickling  | C. s. var. sativus (CSS) | USA                           | 43.22  | -84.49  | A | This study     |      |      |
| 387 | Ohio MR 17         | C. s. var. sativus (CSS) | USA                           | 35.52  | 138.44  | A | This study     |      |      |
| 388 | P 51 DMR           | C. s. var. sativus (CSS) | USA                           | 43.48  | -91.57  | A | This study     |      |      |
| 389 | Parisian Pickling  | C. s. var. sativus (CSS) | USA                           | 44.07  | -96.00  | A | This study     | 40.4 | 28.0 |
| 390 | Pepino             | C. s. var. sativus (CSS) | USA                           | 45.40  | -89.46  | A | This study     |      |      |
| 391 | Pershing           | C. s. var. sativus (CSS) | USA                           | 43.05  | -89.56  | A | This study     |      |      |
| 392 | Pixie              | C. s. var. sativus (CSS) | USA                           | 44.18  | -85.36  | A | This study     |      |      |
| 393 | Poinsett 76        | C. s. var. sativus (CSS) | USA                           | 44.28  | -96.35  | A | This study     | 42.4 | 17.2 |
| 394 | Poinsett 88        | C. s. var. sativus (CSS) | USA                           | 33.97  | -81.05  | A | This study     | 46.0 | 20.4 |
| 395 | Puerto Rico 10     | C. s. var. sativus (CSS) | USA                           | 18.12  | -66.37  | A | This study     | 31.0 | 18.4 |
| 396 | SMR 18             | C. s. var. sativus (CSS) | USA                           | 44.89  | -85.03  | A | This study     | 30.2 | 18.4 |
| 397 | Solly Beiler       | C. s. var. sativus (CSS) | USA                           | 40.02  | -76.1   | A | This study     |      |      |
| 398 | Spacemaster 80     | C. s. var. sativus (CSS) | USA                           | 47.42  | -102.45 | A | This study     | 24.4 | 17.3 |
| 399 | Sumter             | C. s. var. sativus (CSS) | USA                           | 41.22  | -79.15  | A | This study     |      |      |
| 400 | Suyo Long          | C. s. var. sativus (CSS) | USA                           | 43.20  | -83.90  | A | This study     |      |      |
| 401 | Tablegreen         | C. s. var. sativus (CSS) | USA                           | 47.16  | -98.30  | A | This study     |      |      |
| 402 | Tablegreen 66      | C. s. var. sativus (CSS) | USA                           | 43.08  | -74.59  | A | This study     | 60.0 | 18.6 |
| 403 | TAMU 950           | C. s. var. sativus (CSS) | USA                           | 31.47  | 35.13   | A | This study     |      |      |
| 404 | Telegraph Improved | C. s. var. sativus (CSS) | USA                           | 35.39  | 138.43  | A | This study     | 51.0 | 18.8 |
| 405 | Tendergreen        | C. s. var. sativus (CSS) | USA                           | 40.56  | -86.19  | A | This study     |      |      |
| 406 | Thai Mae Sai       | C. s. var. sativus (CSS) | USA                           | 19.54  | 99.5    | A | This study     |      |      |
| 407 | Tiny Dill          | C. s. var. sativus (CSS) | USA                           | 42.96  | -84.55  | A | This study     | 22.6 | 13.7 |
| 408 | Vlaspiik           | C. s. var. sativus (CSS) | USA                           | 42.59  | -89.32  | A | This study     |      |      |
| 409 | Wainwright         | C. s. var. sativus (CSS) | USA                           | 43.01  | -89.27  | A | This study     | 36.2 | 15.2 |
| 410 | Wautoma            | C. s. var. sativus (CSS) | USA                           | 44.04  | -89.17  | A | This study     |      |      |
| 411 | White Wonder       | C. s. var. sativus (CSS) | USA                           | 44.19  | 94.57   | A | This study     | 59.6 | 20.2 |
| 412 | W11983H            | C. s. var. sativus (CSS) | USA                           | 43.09  | -89.27  | A | This study     | 35.3 | 14.0 |
| 413 | W15551             | C. s. var. sativus (CSS) | USA                           | 43.10  | -89.12  | A | This study     | 27.8 | 22.4 |
| 414 | W17010             | C. s. var. sativus (CSS) | USA                           | 44.30  | -94.14  | A | This study     | 32.8 | 16.8 |
| 415 | W17104             | C. s. var. sativus (CSS) | USA                           | 43.30  | -89.10  | A | This study     |      |      |
| 416 | W17105             | C. s. var. sativus (CSS) | USA                           | 39.4   | 114.2   | A | This study     | 55.6 | 19.6 |
| 417 | W17155             | C. s. var. sativus (CSS) | USA                           | 32.5   | 34.48   | A | This study     | 42.0 | 21.0 |
| 418 | W17232             | C. s. var. sativus (CSS) | USA                           | 45.03  | -102.59 | A | This study     |      |      |
| 419 | W17284             | C. s. var. sativus (CSS) | USA                           | 43.04  | -89.24  | A | This study     |      |      |
| 420 | W17285             | C. s. var. sativus (CSS) | USA                           | 31.6   | 35.14   | A | This study     | 57.5 | 17.8 |
| 421 | W17286             | C. s. var. sativus (CSS) | USA                           | 32.3   | 35.5    | A | This study     | 42.0 | 22.6 |
| 422 | W17324             | C. s. var. sativus (CSS) | USA                           | 43.05  | -89.25  | A | This study     | 47.6 | 22.4 |
| 423 | W17383             | C. s. var. sativus (CSS) | USA                           | 43.06  | -89.3   | A | This study     |      |      |
| 424 | W17391             | C. s. var. sativus (CSS) | USA                           | 43.01  | -73.22  | A | This study     |      |      |
| 425 | W17433             | C. s. var. sativus (CSS) | USA                           | 42.25  | -85.55  | A | This study     |      |      |
| 426 | Yellow Submarine   | C. s. var. sativus (CSS) | USA                           | 41.25  | -73.4   | A | This study     |      |      |
| 427 | AM242              | C. s. var. sativus (CSS) | Uzbekistan                    | 14.54  | 99.50   | A | This study     | 29.0 | 20.2 |
| 428 | PI 390953          | C. s. var. sativus (CSS) | Uzbekistan                    | 41.22  | 64.35   | A | This study     |      |      |
| 429 | PI 502331          | C. s. var. sativus (CSS) | Uzbekistan, Samarqand         | 39.7   | 66.98   | A | This study     | 39.4 | 15.7 |
| 430 | PI 500360          | C. s. var. sativus (CSS) | Zambia                        | -14.18 | 28.17   | A | This study     |      |      |
| 431 | PI 482463          | C. s. var. sativus (CSS) | Zimbabwe                      | -19.01 | 29.09   | A | This study     |      |      |
| 432 | PI 482464          | C. s. var. sativus (CSS) | Zimbabwe                      | -17.83 | 31.05   | A | This study     | 35.6 | 21.4 |
| 433 | PI 481614          | C. s. var. sativus (CSS) | Bhutan                        | 27.3   | 90.2    | B | This study     | 25.2 | 22.4 |
| 434 | PI 481617          | C. s. var. sativus (CSS) | Bhutan                        | 28     | 90.7    | B | This study     | 24.8 | 22.4 |
| 435 | PI 356809          | C. s. var. sativus (CSS) | Former Soviet Union           | 55.7   | 37.6    | B | This study     | 24.0 | 21.8 |
| 436 | PI 197088          | C. s. var. sativus (CSS) | India, Assam                  | 25.9   | 91.75   | B | This study     |      |      |
| 437 | Swarna Ageti       | C. s. var. sativus (CSS) | India, HARP, Ranchi Jharkhand | 23.2   | 85.18   | B | This study, PS |      |      |
| 438 | PI 164743          | C. s. var. sativus (CSS) | India, Karnataka              | 15.19  | 75.42   | B | This study     |      |      |
| 439 | PI 370019          | C. s. var. sativus (CSS) | India, Kerala                 | 8.51   | 76.97   | B | This study     | 27.6 | 23.6 |
| 440 | CG8160             | C. s. var. sativus (CSS) | India, Madhya Pradesh         | 23.25  | 77.42   | B | Qi et al. 2013 |      |      |
| 441 | CG8163             | C. s. var. sativus (CSS) | India, Madhya Pradesh         | 23.3   | 77.52   | B | Qi et al. 2013 |      |      |
| 442 | PI 605996          | C. s. var. sativus (CSS) | India, Madhya Pradesh         | 23.25  | 77.41   | B | This study     | 24.2 | 20.6 |
| 443 | PI 267746          | C. s. var. sativus (CSS) | India, Maharashtra            | 18.96  | 72.82   | B | This study     | 25.2 | 23.2 |
| 444 | CG8198             | C. s. var. sativus (CSS) | India, Rajasthan              | 26.57  | 73.84   | B | Qi et al. 2013 |      |      |
| 445 | PI 164465          | C. s. var. sativus (CSS) | India, Rajasthan              | 33     | 73.2    | B | This study     |      |      |
| 446 | PI 605945          | C. s. var. sativus (CSS) | India, Rajasthan              | 27.01  | 74.13   | B | This study     |      |      |
| 447 | PI 605947          | C. s. var. sativus (CSS) | India, Rajasthan              | 26.9   | 74      | B | This study     |      |      |
| 448 | PI 470254          | C. s. var. sativus (CSS) | Indonesia, Kalimantan         | -6.17  | 106.83  | B | This study     |      |      |
| 449 | Ames 22385         | C. s. var. sativus (CSS) | Nepal                         | 28.23  | 84.07   | B | This study     |      |      |
| 450 | PI 163216          | C. s. var. sativus (CSS) | Pakistan, Punjab              | 31     | 72      | B | This study     | 32.4 | 29.5 |
| 451 | PI 163217          | C. s. var. sativus (CSS) | Pakistan, Punjab              | 27.43  | 68.09   | B | This study     | 28.6 | 25.0 |
| 452 | PI 285607          | C. s. var. sativus (CSS) | Poland, Warszawa              | 53.12  | 20.96   | B | This study     | 30.4 | 28.0 |
| 453 | PI 370643          | C. s. var. sativus (CSS) | Russian Federation, Krasnodar | 46.3   | 38.2    | B | This study     |      |      |
| 454 | PI 263079          | C. s. var. sativus (CSS) | Russian Federation, Voronezh  | 61.5   | 90.1    | B | This study     | 25.4 | 23.0 |
| 455 | Brown Russian      | C. s. var. sativus (CSS) | USA                           | 61.41  | 104.04  | B | This study     |      |      |
| 456 | White Emerald      | C. s. var. sativus (CSS) | USA                           | 18.17  | 100.13  | B | This study     | 22.2 | 20.6 |
| 457 | PI 197086          | C. s. var. sativus (CSS) | India, Assam                  | 26.13  | 91.3    | H | This study     | 32.2 | 25.8 |
| 458 | PI 164679          | C. s. var. sativus (CSS) | India, Karnataka              | 12.97  | 77.56   | H | This study     | 59.2 | 14.0 |
| 459 | PI 606013          | C. s. var. sativus (CSS) | India, Madhya Pradesh         | 22.3   | 78.6    | H | This study     |      |      |
| 460 | PI 271328          | C. s. var. sativus (CSS) | India, Maharashtra            | 18.92  | 73.32   | H | This study     |      |      |
| 461 | PI 179676          | C. s. var. sativus (CSS) | India, Rajasthan              | 26.57  | 74.1    | H | This study     | 64.0 | 20.2 |
| 462 | PI 466921          | C. s. var. sativus (CSS) | Russian Federation            | 56.8   | 35.4    | H | This study     |      |      |
| 463 | PI 249562          | C. s. var. sativus (CSS) | Thailand                      | 13.5   | 99.7    | H | This study     |      |      |
| 464 | Ivory Queen        | C. s. var. sativus (CSS) | USA                           | 44.13  | -93.52  | H | This study     |      |      |
| 465 | Modern Early       | C. s. var. sativus (CSS) | USA                           | 43.26  | -89.56  | H | This study     |      |      |
| 466 | Thai Petch Tsai    | C. s. var. sativus (CSS) | USA                           | 16.59  | 99.44   | H | This study     | 42.0 | 17.6 |

|     |           |                                    |                    |       |        |   |        |                |      |      |
|-----|-----------|------------------------------------|--------------------|-------|--------|---|--------|----------------|------|------|
| 467 | PJ 500366 | C. s. var. sativus (CSS)           | Zambia, Copperbelt | -13.3 | 27.32  | H |        | This study     |      |      |
| 468 | SWCC8     | C. s. var. xishuangbannensis (XIS) | China, Yunnan      | 21.24 | 101.35 | B | XIS-1  | This study     |      |      |
| 469 | WI7167    | C. s. var. xishuangbannensis (XIS) | China, Yunnan      | 21.45 | 101.38 | B | XIS-2  | This study     | 20.0 | 19.0 |
| 470 | CG9142    | C. s. var. xishuangbannensis (XIS) | China, Yunnan      | 21.47 | 101.58 | B | XIS-3  | Qi et al. 2013 |      |      |
| 471 | CG9143    | C. s. var. xishuangbannensis (XIS) | China, Yunnan      | 21.98 | 100.82 | B | XIS-4  | Qi et al. 2013 |      |      |
| 472 | CG9146    | C. s. var. xishuangbannensis (XIS) | China, Yunnan      | 21.96 | 100.45 | B | XIS-5  | Qi et al. 2013 |      |      |
| 473 | CG9153    | C. s. var. xishuangbannensis (XIS) | China, Yunnan      | 21.75 | 100.05 | B | XIS-6  | Qi et al. 2013 |      |      |
| 474 | CG9160    | C. s. var. xishuangbannensis (XIS) | China, Yunnan      | 21.84 | 100.38 | B | XIS-7  | Qi et al. 2013 |      |      |
| 475 | CG9164    | C. s. var. xishuangbannensis (XIS) | China, Yunnan      | 21.98 | 100.26 | B | XIS-8  | Qi et al. 2013 |      |      |
| 476 | CG9169    | C. s. var. xishuangbannensis (XIS) | China, Yunnan      | 22.17 | 100.13 | B | XIS-9  | Qi et al. 2013 |      |      |
| 477 | CG9174    | C. s. var. xishuangbannensis (XIS) | China, Yunnan      | 22.18 | 100.33 | B | XIS-10 | Qi et al. 2013 |      |      |
| 478 | CG9185    | C. s. var. xishuangbannensis (XIS) | China, Yunnan      | 22.05 | 100.56 | B | XIS-11 | Qi et al. 2013 |      |      |
| 479 | CG9187    | C. s. var. xishuangbannensis (XIS) | China, Yunnan      | 22.38 | 100.47 | B | XIS-12 | Qi et al. 2013 |      |      |
| 480 | CG9191    | C. s. var. xishuangbannensis (XIS) | China, Yunnan      | 21.86 | 100.57 | B | XIS-13 | Qi et al. 2013 |      |      |
| 481 | CG9192    | C. s. var. xishuangbannensis (XIS) | China, Yunnan      | 21.58 | 100.42 | B | XIS-14 | Qi et al. 2013 |      |      |
| 482 | CG9197    | C. s. var. xishuangbannensis (XIS) | China, Yunnan      | 21.93 | 100.16 | B | XIS-15 | Qi et al. 2013 |      |      |
| 483 | CG9198    | C. s. var. xishuangbannensis (XIS) | China, Yunnan      | 21.2  | 101.3  | B | XIS-16 | Qi et al. 2013 |      |      |
| 484 | CG9199    | C. s. var. xishuangbannensis (XIS) | China, Yunnan      | 22.8  | 101.8  | B | XIS-17 | Qi et al. 2013 |      |      |
| 485 | CG9201    | C. s. var. xishuangbannensis (XIS) | China, Yunnan      | 22.1  | 100.7  | B | XIS-18 | Qi et al. 2013 |      |      |
| 486 | CG9203    | C. s. var. xishuangbannensis (XIS) | China, Yunnan      | 21.55 | 101.26 | B | XIS-19 | Qi et al. 2013 |      |      |
| 487 | CG9165    | C. s. var. xishuangbannensis (XIS) | China, Yunnan      | 21.8  | 101.2  | B | XIS-20 | Qi et al. 2013 |      |      |
| 488 | XIS3-1    | C. s. var. xishuangbannensis (XIS) | China, Yunnan      | 21.5  | 100.2  | B |        | This study-CW  |      |      |
| 489 | XIS3-4    | C. s. var. xishuangbannensis (XIS) | China, Yunnan      | 21.5  | 100.2  | H |        | This study-CW  |      |      |
| 490 | XIS4-1    | C. s. var. xishuangbannensis (XIS) | China, Yunnan      | 21.5  | 100.2  | B |        | This study-CW  |      |      |
| 491 | XIS5-1    | C. s. var. xishuangbannensis (XIS) | China, Yunnan      | 21.5  | 100.2  | B |        | This study-CW  |      |      |
| 492 | XIS14-1   | C. s. var. xishuangbannensis (XIS) | China, Yunnan      | 21.5  | 100.2  | B |        | This study-CW  |      |      |
| 493 | XIS23     | C. s. var. xishuangbannensis (XIS) | China, Yunnan      | 21.5  | 100.2  | B |        | This study-CW  |      |      |
| 494 | XIS24     | C. s. var. xishuangbannensis (XIS) | China, Yunnan      | 21.5  | 100.2  | B |        | This study-CW  |      |      |
| 495 | XIS25     | C. s. var. xishuangbannensis (XIS) | China, Yunnan      | 21.5  | 100.2  | B |        | This study-CW  |      |      |
| 496 | XIS26     | C. s. var. xishuangbannensis (XIS) | China, Yunnan      | 21.5  | 100.2  | H |        | This study-CW  |      |      |
| 497 | XIS27     | C. s. var. xishuangbannensis (XIS) | China, Yunnan      | 21.5  | 100.2  | B |        | This study-CW  |      |      |
| 498 | XIS28     | C. s. var. xishuangbannensis (XIS) | China, Yunnan      | 21.5  | 100.2  | B |        | This study-CW  |      |      |
| 499 | XIS29     | C. s. var. xishuangbannensis (XIS) | China, Yunnan      | 21.5  | 100.2  | B |        | This study-CW  |      |      |
| 500 | XIS30     | C. s. var. xishuangbannensis (XIS) | China, Yunnan      | 21.5  | 100.2  | B |        | This study-CW  |      |      |
| 501 | XIS31     | C. s. var. xishuangbannensis (XIS) | China, Yunnan      | 21.5  | 100.2  | B |        | This study-CW  |      |      |
| 502 | XIS33     | C. s. var. xishuangbannensis (XIS) | China, Yunnan      | 21.5  | 100.2  | B |        | This study-CW  |      |      |
| 503 | HYSTH1    | C. hystrix                         | China, Yunnan      | 21.5  | 100.2  | A |        | This study-CW  |      |      |
| 504 | HYS1-1    | C. hystrix                         | China, Yunnan      | 21.5  | 100.2  | A |        | This study-CW  |      |      |
| 505 | HYS2-1    | C. hystrix                         | China, Yunnan      | 21.5  | 100.2  | A |        | This study-CW  |      |      |
| 506 | HYS6-1    | C. hystrix                         | China, Yunnan      | 21.5  | 100.2  | A |        | This study-CW  |      |      |
| 507 | HYS9-1    | C. hystrix                         | China, Yunnan      | 21.5  | 100.2  | A |        | This study-CW  |      |      |
| 508 | HYS11-1   | C. hystrix                         | China, Yunnan      | 21.5  | 100.2  | A |        | This study-CW  |      |      |
| 509 | HYS12-1   | C. hystrix                         | China, Yunnan      | 21.5  | 100.2  | A |        | This study-CW  |      |      |
| 510 | HYS15-1   | C. hystrix                         | China, Yunnan      | 21.5  | 100.2  | A |        | This study-CW  |      |      |
| 511 | HYS16-1   | C. hystrix                         | China, Yunnan      | 21.5  | 100.2  | A |        | This study-CW  |      |      |

<sup>a</sup> Alleles of the *Sh1* locus genotyped with dCAPS-51 SNP: A from CC3 (LDUVB sensitive), B from SWCC8 (LDUVB insensitive)

<sup>b</sup> Hypocotyl length (in centimeters) of 211 lines measured at UVB-free and LDUVB condition. Data were collected 10d after germination in each environment.







**Table S3.** Information of primers used in genetic mapping, gene expression and yeast two-hybrid assay.

| Marker/primer | Uses                        | Left primer (5' to 3')                | Right primer (5' to 3')                  | Enzyme      | Corresponding Arabidopsis genes |
|---------------|-----------------------------|---------------------------------------|------------------------------------------|-------------|---------------------------------|
| SSR03409      | Mapping                     | AAGACGTGACAACCAACTGAA                 | TGACTGGGACAATTGTAGACTCC                  |             |                                 |
| dCAPS-59      | Mapping                     | ACGATTAGACTAGAGATTGT                  | AGCAACCCAAATGTTTTTC                      | RsaI        |                                 |
| dCAPS-51      | Mapping                     | ATACTTACTCATCACAGGTA                  | TTCCCTCTTTGTGCGTACTT                     | RsaI        |                                 |
| dCAPS-68      | Mapping                     | ACAAAACGGGCATTTAAGGA                  | AAACAAGTGGTGATCAATAC                     | Maell       |                                 |
| Indel-22      | Mapping                     | TTGGAATTTAGTAAAAGAAATTTTGA            | TAACTCAGACCCCTCATGC                      |             |                                 |
| SSR31430      | Mapping                     | CGATTTTCAAACGACATTG                   | TAATTGGGCCTGATCCATTC                     |             |                                 |
| Sh1-1         | cDNA cloning                | TCCGGAATACCCAAAAGTTC                  | GTAGCTCCAGCTTCCATGT                      |             |                                 |
| Sh1-2         | cDNA cloning                | TGGAGTGGGCAAAATGTGT                   | CCAGTAAGACACCAGCGACA                     |             |                                 |
| Sh1-3         | cDNA cloning                | CCCCGAGGTGCTATTAGGAT                  | CAACCCACCAGCTTTTAGA                      |             |                                 |
| Sh1-4         | cDNA cloning                | TCGAAGATGTTGTCGAGTGC                  | TTTTACAGAGAGGCCCATCG                     |             |                                 |
| β-actin       | qPCR, reference gene        | ATTGTTCTCAGTGGTGGTCTAC                | CCTTTGAGATCCACATCTGCT                    |             |                                 |
| gene1         | qPCR                        | TCACCTTCGTCTTGTGGGAA                  | CACAGGCACAAGGGGTTAG                      |             |                                 |
| gene2 (Sh1)   | qPCR                        | ATCCATGCTGGTCAGCCTAC                  | CTTGCCATCTGTGTGCAGT                      |             |                                 |
| gene3         | qPCR                        | TCCTTTGAAATGGTGCACAA                  | CGTTGACCTTTCTCCTGCC                      |             |                                 |
| gene4         | qPCR                        | CCAACCAAGTCCCAAGAGA                   | ACATCATATGCCCTCTCCCG                     |             |                                 |
| CsUVR8        | qPCR, UV responsive genes   | TGGATGGAGGCACACTAG                    | TTCCGATCAACTGACTCCCC                     |             | AT5G63860                       |
| CsCOP1        | qPCR, UV responsive genes   | GTGGCATAGGTTCCGGTTCAC                 | AGGACTGCACTCTCCAGC                       |             | AT2G32950                       |
| CsHY5         | qPCR, UV responsive genes   | GGAAATGGAGAGCGATGAGGA                 | GACCTCCCGAGAAACTTGA                      |             | AT5G11260                       |
| CsCHS         | qPCR, UV responsive genes   | CGTTGTTGGAGATGGTGCA                   | TTCCCTCAAATGTCCGTCGA                     |             | AT5G13930                       |
| CsEXP2        | qPCR, Cell elongation genes | TTCGAAAACAGGGTGGCAAG                  | GCTGGTGGTGACTTGGAAAG                     |             | At5g05290                       |
| CsDWF4        | qPCR, Cell elongation genes | ATCTTCTTCTCCGGCAG                     | CACGACGTTTTCCAAAGCGAA                    |             | At3g50660                       |
| CsEXT3        | qPCR, Cell elongation genes | TTTGCTGCCTTTGTTGCTCT                  | GTGGAGGAGGAGAAGCGTAG                     |             | At1g21310                       |
| CsIAA19       | qPCR, Cell elongation genes | GCGACTTCATCTGCAGTCAA                  | CGTGGCCTCTGTTTTCTTCA                     |             | At3g15540                       |
| CsXTH17       | qPCR, Cell elongation genes | AGAGGATGGCTGTCGGAAAA                  | TCTCTTGGCGTCGGTACAAT                     |             | At1g65310                       |
| CsXTR6        | qPCR, Cell elongation genes | TAACTCTGCTGGCACTGTCA                  | AGGCTCCCACTCAAGTTAC                      |             | At4g25810                       |
| BD-SH1        | yeast two hybrid (Y2H)      | CATGGAGGCCGAATTCATGGAGGTAACGCCATTCTAG | GCAGGTCGACGGATCCTCATCTAAATAGCATCTTGAGCTC | EcoR1/BamH1 |                                 |
| BD-COP1       | yeast two hybrid (Y2H)      | CATGGAGGCCGAATTCATGGACGACGGATCAACCCGG | GCAGGTCGACGGATCCTTAAACCGCAAGAACCAGCACC   | EcoR1/BamH1 |                                 |
| AD-HY5        | yeast two hybrid (Y2H)      | GGAGGCCAGTGAATTCATGCAGGAGCAAGCGAC     | CGAGCTCGATGGATCCTCACTCACCCTTCTCCTAC      | EcoR1/BamH1 |                                 |
| AD-COP1       | yeast two hybrid (Y2H)      | GGAGGCCAGTGAATTCATGGACGACGGATCAACCCGG | CGAGCTCGATGGATCCTTAAACCGCAAGAACCAGCACC   | EcoR1/BamH1 |                                 |
| AD-UVR8       | yeast two hybrid (Y2H)      | GGAGGCCAGTGAATTCATGGAAGCGACTTCTCCAG   | CGAGCTCGATGGATCCTCAGACACGTAACCTTTTACATC  | EcoR1/BamH1 |                                 |
